# Supplementary material
Source: PubMed Central journal article supplement (PMC5541231)
Supplement: AEM.00260-17_zam999117994s1.pdf [file AEM.00260-17_zam999117994s1.pdf]

1 **Supplemental Material**

2

3 **Colonization habitat controls biomass, composition, and metabolic activity of attached**  
4 **microbial communities in the Columbia River hyporheic corridor**

5

6 Noah Stern<sup>a</sup>, Matthew Ginder-Vogel<sup>a</sup>, James C. Stegen<sup>b</sup>, Evan Arntzen<sup>b</sup>, David W. Kennedy<sup>b</sup>,  
7 Bret R. Larget<sup>c</sup>, and Eric E. Roden<sup>d#</sup>

8

9 Environmental Chemistry and Technology Program, Department of Civil and Environmental  
10 Engineering, University of Wisconsin-Madison, Madison, WI 53706, USA<sup>a</sup>; Biological Sciences  
11 Division, Pacific Northwest National Laboratory, Richland, WA 99354, USA<sup>b</sup>; Department of  
12 Statistics, University of Wisconsin-Madison, Madison, WI 53706, USA<sup>c</sup>; Department of  
13 Geoscience, University of Wisconsin-Madison, Madison, WI 53706, USA<sup>d</sup>

14

15 Supplemental Text 1-2

16 Supplemental Figures S1-S11

17 Supplemental Tables S1-S6

### **Supplemental Text 1 – Analytical Methods**

**DOC measurement.** Dissolved organic carbon (DOC) was determined with a Shimadzu combustion carbon analyzer TOC-Vcsh with ASI-V auto sampler. DIC was removed in the instrument by acidification of the sample with 2M HCl (Fisher) with a 5 minute sparging time. The sample was then injected into the furnace set to 680 °C. Organic carbon standards were made from potassium hydrogen phthalate solid, (Acros Organics). The calibration range for the DOC determinations was from 0.10 to 10 mg C L<sup>-1</sup>.

**ATP biomass assay.** ATP content was used as a measure of microbial biomass in the reactors. The methods employed were adapted from those reported in Graham et al. (11), using the Promega Glomax 20/20 Luminator with Bactiter-Glo Microbial Cell Viability Assay (Promega). Approximately 0.5 g of wet sand sample was mixed with 0.5 mL of sterile (autoclaved) 20 mM EDTA (Fluka) in 2 mL Nalgene Cryogenic Vials (Thermoscientific) and stored at -20°C. Samples were returned to room temperature prior to analysis and measured after 5 min incubation with Bactiter-Glo reagent and 25 µL of 0.4M MgCl<sub>2</sub>. Standard curves were prepared with Adenosine 5'-triphosphate magnesium salt (Sigma) in 20 mM EDTA and ranged from 0 – 10 nM.

**Resazurin reduction assay.** Resazurin reduction assays were conducted with samples from the microcosms as a measure of aerobic respiratory activity (12). The methods employed were adapted from those reported in Graham et al. (11). Assays were started by adding approximately 2.5 g of wet sand to 100 µl of 30 µM resazurin and 2.5 mL of feed stock solution to vials, gently mixing and then incubating at room temperature in the dark on an angle at 50 rpm. After 48 hr the vials were weighed and 3 mL of acetonitrile (ACN) (HPLC Grade, Fischer Chemical) was added. After ACN addition, vials were sealed, vortexed, and reweighed before being placed in a

sonicator bath for 10 min. After sonication, vials were put back on the 50 rpm shaker. After a 1 hr extraction time, vials were vortexed and the sand was allowed to settle. The screw cap was removed and 5 mL of extract was passed through a 17 mm, 0.22  $\mu\text{m}$  Teflon syringe filter (Thermoscientific) into pre-labeled 12 mL glass amber vials and stored at 4°C. The extraction vial with the remaining sand was dried at 75 °C for 72 hr then weighed to obtain dry sand weight. Fluorescence emission maxima for resazurin (630 nm) and resorufin (585 nm) were measured on resazurin sample extracts using a Horiba Fluorolog 3 fluorimeter. Resazurin reduction extracts were analyzed in quartz cuvettes and diluted 1:1 with ACN:ARW when above the calibration range. Fluorescence intensity was quantified by comparison to standards of resazurin ranging from 0 to 1.0  $\mu\text{M}$  (Sigma) and resorufin ranging from 0 to 0.2  $\mu\text{M}$  (Sigma) prepared in ACN:ARW (1:1).

**Linear mixed modeling.** Linear mixed model (LMM) analysis was used to determine the influence of sand type, feed stock solution, and time on biomass and respiration values in the reactors. The LMM analysis was implemented using packages lme4 and lmerTest in the R statistical package (30). Additional R packages ggplot, tidyr, dplyr, and viridis were also used (1, 5, 8, 10, 31, 32). Implementation included an adaptation of the original linear fit equation to use the final time point from each experiment to calculate the modeled intercepts; this allowed for comparison of the final status of the reactors based on the fitted model intercept. For the cross feed biomass LMM, both three-way and four-way interactions were significant. In all other cases three-way and four way-factor interactions were not significant and were therefore removed from the models. Biomass data for the two replicate cross feeding experiments (CF1 and CF2) were consistent and were modeled together. Due to the presence of a handful of CF1 respiration data points that were close to the detection limit, separate models were required for the CF1 and CF2

respiration data. Pair wise comparisons were performed using standard t-test on the difference between the log of the final time point for the two reactors being compared.

**DNA extraction, sequencing and processing.** Samples from replicate reactor types at each time point were pooled for DNA extraction. This approach was required to obtain sufficient DNA for 16S rRNA gene sequencing. DNA was extracted from the pooled materials as described in Graham et al. (11). DNA extracts were amplified using the universal 16S rRNA gene primers (515F-806R) described in Caporaso et al. (4), adapted for the Illumina MiSeq platform by adding nine extra bases in the adapter region of the forward amplification primer that support paired-end sequencing. The reverse amplification primer contained a twelve base barcode sequence. Each 25  $\mu$ L PCR reaction contained 12  $\mu$ L of MoBio PCR Water (Certified DNA472 Free), 10  $\mu$ L of 5 Prime HotMasterMix (1x), 1  $\mu$ L of forward primer (5  $\mu$ M concentration, 200 pM final), 1  $\mu$ L Golay Barcode Tagged Reverse Primer (5  $\mu$ M concentration, 200 pM final), and 1  $\mu$ L of template DNA. The conditions for PCR were: 94°C for 3 min to denature DNA, with 35 cycles at 94°C for 45 s, 50°C for 60 s, and 72°C for 90 s; with a final extension of 10 min at 72°. Amplicons were quantified using PicoGreen (Invitrogen) and a plate reader. Appropriate volumes of PCR product from each sample were then pooled so that each sample was represented with an equal amount of product. This pool was cleaned using the UltraClean® PCR Clean-Up Kit (MoBIO), and quantified using the Qubit (Invitrogen). After quantification, the molarity of the pool was determined and diluted to 2 nM, denatured, and then diluted to a final concentration of 6.7 5pM with a 10% PhiX spike for sequencing on the Illumina MiSeq.

The 16S rRNA gene amplicon sequences were processed in QIIME 1.8.0. (3). First, the function `split_libraries_fastq.py` was used to demultiplex the fastq-formatted sequences, with a Phred quality cutoff of 20. To identify chimeras the function `identify_chimeric_seqs.py` was used

to call USEARCH v6.1 with 'non\_chimera\_retention' set to 'intersection.' After removing identified chimeras (with function filter\_fasta.py) the function pick\_open\_reference\_otus.py was used to call USEARCH v6.1, pick operational taxonomic units (OTUs), and generate the associated phylogeny (97% similarity) using the SILVA (Release 111) database. The number of reads per library (107 total) ranged from ca. 13,000 to 125,000, with a mean of  $51,726 \pm 28,079$ . The software package Primer (version 7.0) was used for non-metric dimensional scaling (NMDS) analysis of microbial community composition, and for analysis of similarity (ANOSIM) comparisons of community composition among different reactor treatments.

## Supplemental Text 2 – Comparative analysis of Proteobacterial and non-Proteobacterial taxa in the colonized sand reactors

*Proteobacteria*. Several basic patterns were evident within the dominant Proteobacterial classes. For the *Alphaproteobacteria* (ca. 9 to 28 % of all Proteobacteria), there was considerable variation among sand types across the three experiments, but in general the dominant taxa were heterotrophs (15) from the *Hyphomicrobiaceae*, *Hyphomonadaceae*, *Rhodospirillaceae*, *Rhodobacteraceae*, and *Sphingomonadaceae*. Similarly, for all sand types the *Betaproteobacteria* (ca. 27 to 65 % of all Proteobacteria) were dominated by the heterotrophic families *Comamonadaceae*, *Methylophilaceae*, *Oxalobacteraceae*, and *Rhodocyclaceae*. Likewise, the *Gammaproteobacteria* (ca. 12 to 34 % of all Proteobacteria) were dominated by a common group of heterotrophic taxa from the *Alteromonadaceae*, *Coxiellaceae*, *Moraxellaceae*, *Piscirickettsiaceae*, *Pseudomonadaceae*, *Sinobacteraceae*, and *Xanthomonadaceae*.

By far the largest distinction among Proteobacteria across sand type was the much higher abundance of *Deltaproteobacteria* in RBS and PZS, both initially and throughout the incubation experiments (Figure 8). Across all sand types and time points, *Deltaproteobacteria* accounted for 2-3 % of total *Proteobacteria* in GWS, 14-17 % for RBS, and 7-11 % for PZS (Table 3). For GWS, the dominant families were *Bdellovibrionaceae* (and the related family OM27, 24) and *Haliangiaceae*, which represent gram-negative, obligate predators of other gram-negative bacteria (26); and bacteriolytic- and non-cellulolytic-type myxobacteria (9), respectively. Although these families (along with other myxobacteria and predatory families such as *Myxococcaceae* and *Bacteriovoracaceae*; Tables S2-S4) were present in RBS and PZS, *Deltaproteobacteria* in these two sand types also contained significant numbers of anaerobic fermentative and respiratory taxa such as *Syntrophobacteraceae* (16) and *Geobacteraceae* (25).

*Syntrophobacteraceae* accounted for 1-2 % of total Proteobacteria in RBS and PZS, whereas *Geobacteraceae* were ca. 10-fold more abundant in RBS (1-2 %) compared to PZS (ca. 0.1 %). It is also significant that the majority (60-70 %) of the unclassified *Delatproteobacterial* families in RBS and PZS (3-8 % of total Proteobacteria) were from in the order *Myxococcales*, which includes a wide variety of heterotrophic taxa, including the well-known anaerobic respiratory family *Anaeromyxobacteraceae* (28, 33).

*Non-Proteobacteria*. Several broad trends in the dominant non-Proteobacterial taxa were also evident (Table 3). The abundance of *Bacteroidetes* and *Nitrospirae* was consistent across all three sand types. Although there were differences in the distribution of families within the *Bacteroidetes* (Tables S4-S6), in general the dominant ones (e.g. *Chitinophagaceae*, *Flavobacteriaceae*, *Saprospiraceae*, as well as unassigned (at the family level) organisms from class *Sphingobacteria*, order *Sphingobacteriales*, which includes the genus *Sphingobacterium*) are all metabolically versatile heterotrophs known to occupy soil, aquatic, sewage sludge, and compost habitats (2, 17, 19). For the phylum *Nitrospirae*, organisms from the nitrite-oxidizing genus *Nitrospira* (6) accounted for 1-2 % of total reads and for more than 80% of all reads in the phylum. Similarly, *Crenarchaeota* from the families *Cenarchaeaceae* or *Nitrososphaeraceae* (class *Thaumarchaeota*), both of which include aerobic ammonium-oxidizing organisms (21) were detected in each of the sand types at ca. 2-4 % of all reads.

In contrast to *Bacteroidetes*, *Nitrospirae*, and the *Crenarchaeota*, organisms from the *Acidobacteria*, *Planctomycetes*, and *Verruimicrobia* phyla were several-fold more abundant in RBS and PZS compared to GWS (Table 3). The *Acidobacteria* were dominated by families within classes *Chloracidobacteria* and *Acidobacteria*, which have been identified in soil habitats and are known for their ability to degrade plant and microbial polysaccharides (2, 23, 27). The

*Planctomycetes* taxa were affiliated with the *Gemmataceae*, *Isosphaeraceae*, *Pirellulaceae*, and *Planctomycetaceae* families, all of which are aerobic heterotrophic budding bacteria with unique intracellular compartmental (organelle) structures (18, 22). The *Verrucomicrobia* were dominated by taxa related to cultivated and uncultivated organisms from classes *Opitutae*, *Pedosphaerae*, *Spartobacteria*, and *Verrucomicrobiae*. Organisms within these families are mainly aerobes common in soils or other organic-rich environments (e.g. 7, 13, 14, 20, 29, 34).

## REFERENCES

1. **Bates, D., M. Machler, B. Bolker, and S. Walker.** 2015. Fitting Linear Mixed-Effects Models Using {lme4}. *J. Stat. Software* **67**:1-48.
2. **Campbell, B. J.** 2014. The Family *Acidobacteriaceae*, p. 405-415. *In* E. Rosenberg, E. F. DeLong, S. Lory, E. Stackebrandt, and F. Thompson (ed.), *The Prokaryotes: Other Major Lineages of Bacteria and The Archaea*. Springer Berlin Heidelberg, Berlin, Heidelberg.
3. **Caporaso, J. G., J. Kuczynski, J. Stombaugh, K. Bittinger, F. D. Bushman, E. K. Costello, N. Fierer, A. G. Pena, J. K. Goodrich, and J. I. Gordon.** 2010. QIIME allows analysis of high-throughput community sequencing data. *Nature Meth.* **7**:335-336.
4. **Caporaso, J. G., C. L. Lauber, W. A. Walters, D. Berg-Lyons, C. A. Lozupone, P. J. Turnbaugh, N. Fierer, and R. Knight.** 2011. Global patterns of 16S rRNA diversity at a depth of millions of sequences per sample. *P Natl Acad Sci USA* **108**:4516-4522.
5. **Christensen, A. K. a. P. B. B. a. R. H. B.** 2016. lmerTest: Tests in Linear Mixed Effects Models. R package version 2.0-32.
6. **Daims, H.** 2014. The Family *Nitrospiraceae*, p. 733-749. *In* E. Rosenberg, E. F. DeLong, S. Lory, E. Stackebrandt, and F. Thompson (ed.), *The Prokaryotes: Other Major Lineages of Bacteria and The Archaea*. Springer Berlin Heidelberg, Berlin, Heidelberg.
7. **Eichorst, S. A., J. A. Breznak, and T. M. Schmidt.** 2007. Isolation and characterization of soil bacteria that define *Teniglobus* gen. nov., in the phylum *Acidobacteria*. *Appl. Environ. Microbiol.* **73**:2708-2717.
8. **Francois, H. W. a. R.** 2015. dplyr: A Grammar of Data Manipulation. R package version 0.4.3.
9. **Garcia, R., and R. Müller.** 2014. The Family *Haliangiaceae*, p. 173-181. *In* E. Rosenberg, E. F. DeLong, S. Lory, E. Stackebrandt, and F. Thompson (ed.), *The Prokaryotes: Deltaproteobacteria and Epsilonproteobacteria*. Springer Berlin Heidelberg, Berlin, Heidelberg.
10. **Garnier, S.** 2016. viridis: Default Color Maps from 'matplotlib. R package version 0.3.4.
11. **Graham, E. B., A. R. Crump, C. T. Resch, S. Fansler, E. Arntzen, D. W. Kennedy, J. K. Fredrickson, and J. C. Stegen.** 2016. Coupling spatiotemporal community assembly processes to changes in microbial metabolism. *Front. Microbiol.* **7**.
12. **Haggerty, R., A. Argerich, and E. Marti.** 2008. Development of a "smart" tracer for the assessment of microbiological activity and sediment-water interaction in natural waters: The resazurin-resorufin system. *Wat. Resour. Res.* **44**.



13. **Hernandez, M., M. G. Dumont, Q. Yuan, and R. Conrad.** 2015. Different bacterial populations associated with the roots and rhizosphere of rice incorporate plant-derived carbon. *Appl. Environ. Microbiol.* **81**:2244-2253.
14. **Kant, R., M. W. J. van Passel, P. Sangwan, A. Palva, S. Lucas, A. Copeland, A. Lapidus, T. G. del Rio, E. Dalin, H. Tice, D. Bruce, L. Goodwin, S. Pitluck, O. Chertkov, F. W. Larimer, M. L. Land, L. Hauser, T. S. Brettin, J. C. Detter, S. S. Han, W. M. de Vos, P. H. Janssen, and H. Smidt.** 2011. Genome sequence of "*Pedosphaera parvula*" Ellin514, an aerobic *Verrucomicrobial* isolate from pasture soil. *J. Bacteriol.* **193**:2900-2901.
15. **Kerstens, K., P. Devos, M. Gillis, J. Swings, P. Vandamme, and E. Stackebrandt.** 2006. Introduction to the Proteobacteria, p. 3-37. *In* M. Dworkin, S. Falkow, E. Rosenberg, K. H. Schleifer, and E. Stackebrandt (ed.), *The Prokaryotes: A Handbook on the Biology of Bacteria*, 3rd Edition, Release 3.12. Springer, New York.
16. **Kuever, J.** 2014. The Family *Syntrophobacteraceae*, p. 289-299. *In* E. Rosenberg, E. F. DeLong, S. Lory, E. Stackebrandt, and F. Thompson (ed.), *The Prokaryotes: Deltaproteobacteria and Epsilonproteobacteria*. Springer Berlin Heidelberg, Berlin, Heidelberg.
17. **Lambiase, A.** 2014. The Family *Sphingobacteriaceae*, p. 907-914. *In* E. Rosenberg, E. F. DeLong, S. Lory, E. Stackebrandt, and F. Thompson (ed.), *The Prokaryotes: Other Major Lineages of Bacteria and The Archaea*. Springer Berlin Heidelberg, Berlin, Heidelberg.
18. **Lindsay, M. R., R. I. Webb, M. Strous, M. S. Jetten, M. K. Butler, R. J. Forde, and J. A. Fuerst.** 2001. Cell compartmentalisation in *Planctomycetes*: novel types of structural organisation for the bacterial cell. *Arch. Microbiol.* **175**:413-429.
19. **McIlroy, S. J., and P. H. Nielsen.** 2014. The Family *Saprospiraceae*, p. 863-889. *In* E. Rosenberg, E. F. DeLong, S. Lory, E. Stackebrandt, and F. Thompson (ed.), *The Prokaryotes: Other Major Lineages of Bacteria and The Archaea*. Springer Berlin Heidelberg, Berlin, Heidelberg.
20. **Navarrete, A. A., T. R. Diniz, L. P. P. Braga, G. G. Z. Silva, J. C. Franchini, R. Rossetto, R. A. Edwards, and S. M. Tsai.** 2015. Multi-analytical approach reveals potential microbial indicators in soil for sugarcane model systems. *PLoS One* **10**.
21. **Oshiki, M., H. Satoh, and S. Okabe.** 2016. Ecology and physiology of anaerobic ammonium oxidizing bacteria. *Environ. Microbiol.* **18**:2784-2796.
22. **Pinos, S., P. Pontarotti, D. Raoult, J. P. Baudoin, and I. Pagnier.** 2016. Compartmentalization in PVC super-phylum: evolution and impact. *Biol. Direct* **11**.
23. **Quaiser, A., T. Ochsenreiter, C. Lanz, S. C. Schuster, A. H. Treusch, J. Eck, and C. Schleper.** 2003. *Acidobacteria* form a coherent but highly diverse group within the bacterial domain: evidence from environmental genomics. *Mol. Microbiol.* **50**:563-575.
24. **Rappe, M. S., P. F. Kemp, and S. J. Giovannoni.** 1997. Phylogenetic diversity of marine coastal picoplankton 16S rRNA genes cloned from the continental shelf off Cape Hatteras, North Carolina. *Limnol. Oceanogr.* **42**:811-826.
25. **Röling, W. F. M.** 2014. The Family *Geobacteraceae*, p. 157-172. *In* E. Rosenberg, E. F. DeLong, S. Lory, E. Stackebrandt, and F. Thompson (ed.), *The Prokaryotes: Deltaproteobacteria and Epsilonproteobacteria*. Springer Berlin Heidelberg, Berlin, Heidelberg.
26. **Rotem, O., Z. Pasternak, and E. Jurkevitch.** 2014. *Bdellovibrio* and Like Organisms, p. 3-17. *In* E. Rosenberg, E. F. DeLong, S. Lory, E. Stackebrandt, and F. Thompson (ed.),

- The Prokaryotes: Deltaproteobacteria and Epsilonproteobacteria. Springer Berlin Heidelberg, Berlin, Heidelberg.
27. **Sait, M., P. Hugenholtz, and P. H. Janssen.** 2002. Cultivation of globally distributed soil bacteria from phylogenetic lineages previously only detected in cultivation-independent surveys. *Environ. Microbiol.* **4**:654-666.
  28. **Sanford, R. A., J. R. Cole, and J. M. Tiedje.** 2002. Characterization and description of *Anaeromyxobacter dehalogenans* gen. nov., sp nov., an aryl-halorespiring facultative anaerobic myxobacterium. *Appl. Environ. Microbiol.* **68**:893-900.
  29. **Sangwan, P., X. L. Chen, P. Hugenholtz, and P. H. Janssen.** 2004. *Chthoniobacter flavus* gen. nov., sp nov., the first pure-culture representative of subdivision two, *Spartobacteria* classis nov., of the phylum *Verrucomicrobia*. *Appl. Environ. Microbiol.* **70**:5875-5881.
  30. **TeamR.** 2016. R: A Language and Environment for Statistical Computing. R Foundation for Statistical Computing, Vienna, Austria.
  31. **Wickham, H.** 2009. *ggplot2: Elegant Graphics for Data Analysis*. Springer-Verlag New York.
  32. **Wickham, H.** 2016. *tidyr: Easily Tidy Data with `spread()` and `gather()` Functions*. R package version 0.4.1.
  33. **Yamamoto, E., H. Muramatsu, and K. Nagai.** 2014. *Vulgatibacter incomptus* gen. nov., sp nov and *Labilithrix luteola* gen. nov., sp nov., two myxobacteria isolated from soil in Yakushima Island, and the description of *Vulgatibacteraceae* fam. nov., *Labilitrichaceae* fam. nov and *Anaeromyxobacteraceae* fam. nov. *Int. J. Syst. Evol. Microbiol.* **64**:3360-3368.
  34. **Yoon, J.** 2014. The Family *Verrucomicrobiaceae*, p. 1017-1018. In E. Rosenberg, E. F. DeLong, S. Lory, E. Stackebrandt, and F. Thompson (ed.), *The Prokaryotes: Other Major Lineages of Bacteria and The Archaea*. Springer Berlin Heidelberg, Berlin, Heidelberg.

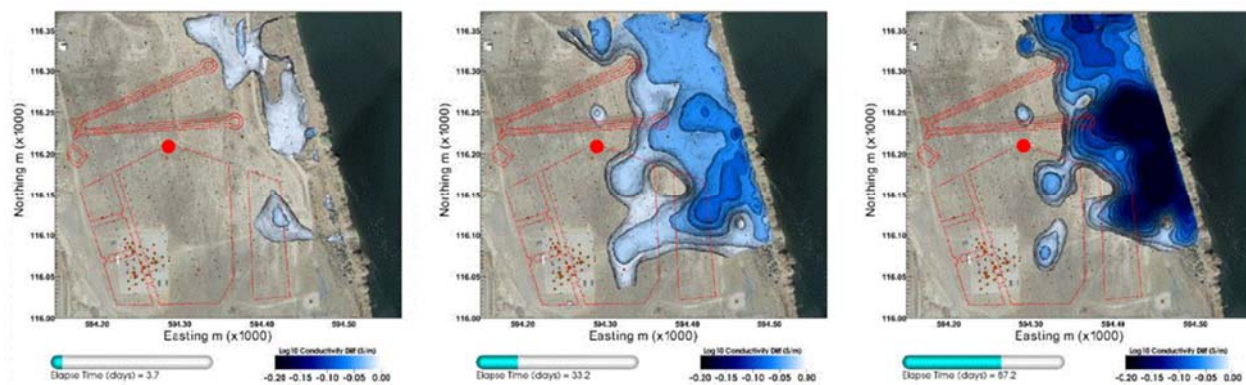

Figure S1. The varying stages of river water intrusion at the Hanford Area 300 site (modified from Figs. 11 and 12 in Johnson et al., 2015, *Water Resour. Res.*, 51, doi:10.1002/2014WR016129; used by permission). Darker blue coloration shows decrease in conductivity associated with higher DOC in river water. Elapsed time shown for a period of approximately 54 days. The red dot shows the location of groundwater well 2-32, from which water was obtained for the experiments reported in this paper.

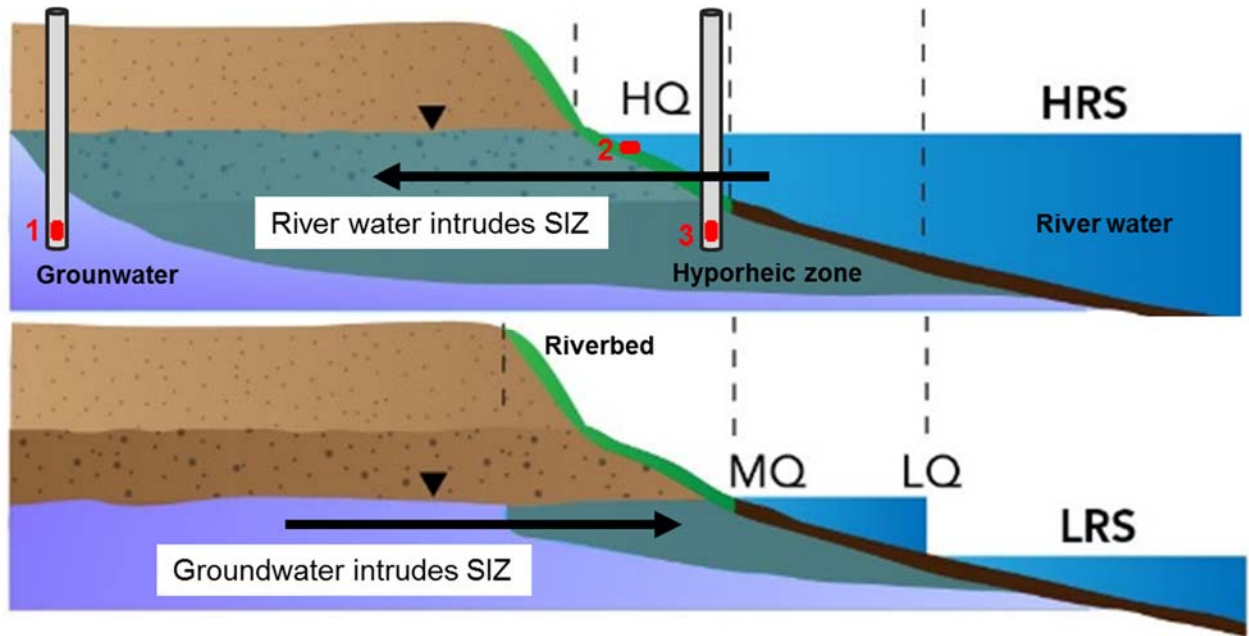

Figure S2. Diagrammatic representation of river stage driven hydrological dynamics within the Hanford 300 Area SIZ. During high river stage (HRS), large river water-groundwater exchange (HQ) takes place during river water intrusion into the SIZ, whereas during low river stage (LRS), medium (MQ) or low (LQ) river water-groundwater exchange takes place and net groundwater release into the SIZ may take place. The red dots correspond to the three habitats examined in this study (1 = groundwater; 2 = riverbed; 3 = hyporheic zone piezometer).

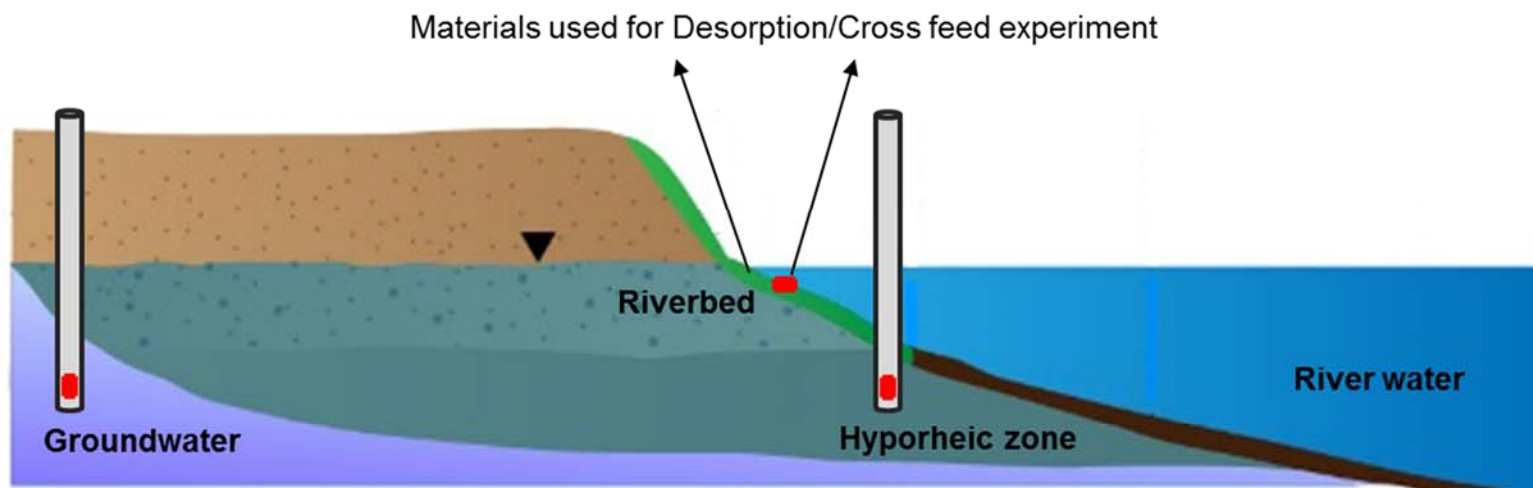

### Cross feed experiments 1 and 2:

Step 1: Incubate sand packs (red ovals) *in situ* within groundwater, riverbed, and hyporheic zone environments for 6 weeks to allow for microbial colonization.

Step 2: Expose the different colonized sand materials to either (1) filter-sterilized groundwater, (2) filter-sterilized river water, or (3) autoclaved (DOC-free) artificial groundwater and/or artificial river water.

### Desorption/Cross feed experiment:

Step 1: Incubate sand packs (red ovals) *in situ* within groundwater, riverbed, and hyporheic zone environments for 6 weeks to allow for microbial colonization.

Step 2: Collect “desorbed” DOC from either riverbed sediment or riverbed colonized sand packs.

Step 2: Expose the different colonized sand materials to either (1) filter-sterilized river water, (2) filtered-sterilized “desorbed” DOC from riverbed sediment, (3) filtered-sterilized “desorbed” DOC from riverbed colonized sand packs, or (4) autoclaved (DOC-free) artificial river water.

Figure S3. Conceptual explanation of the cross feeding and desorption/cross feeding experiments. See Materials and Methods for details.

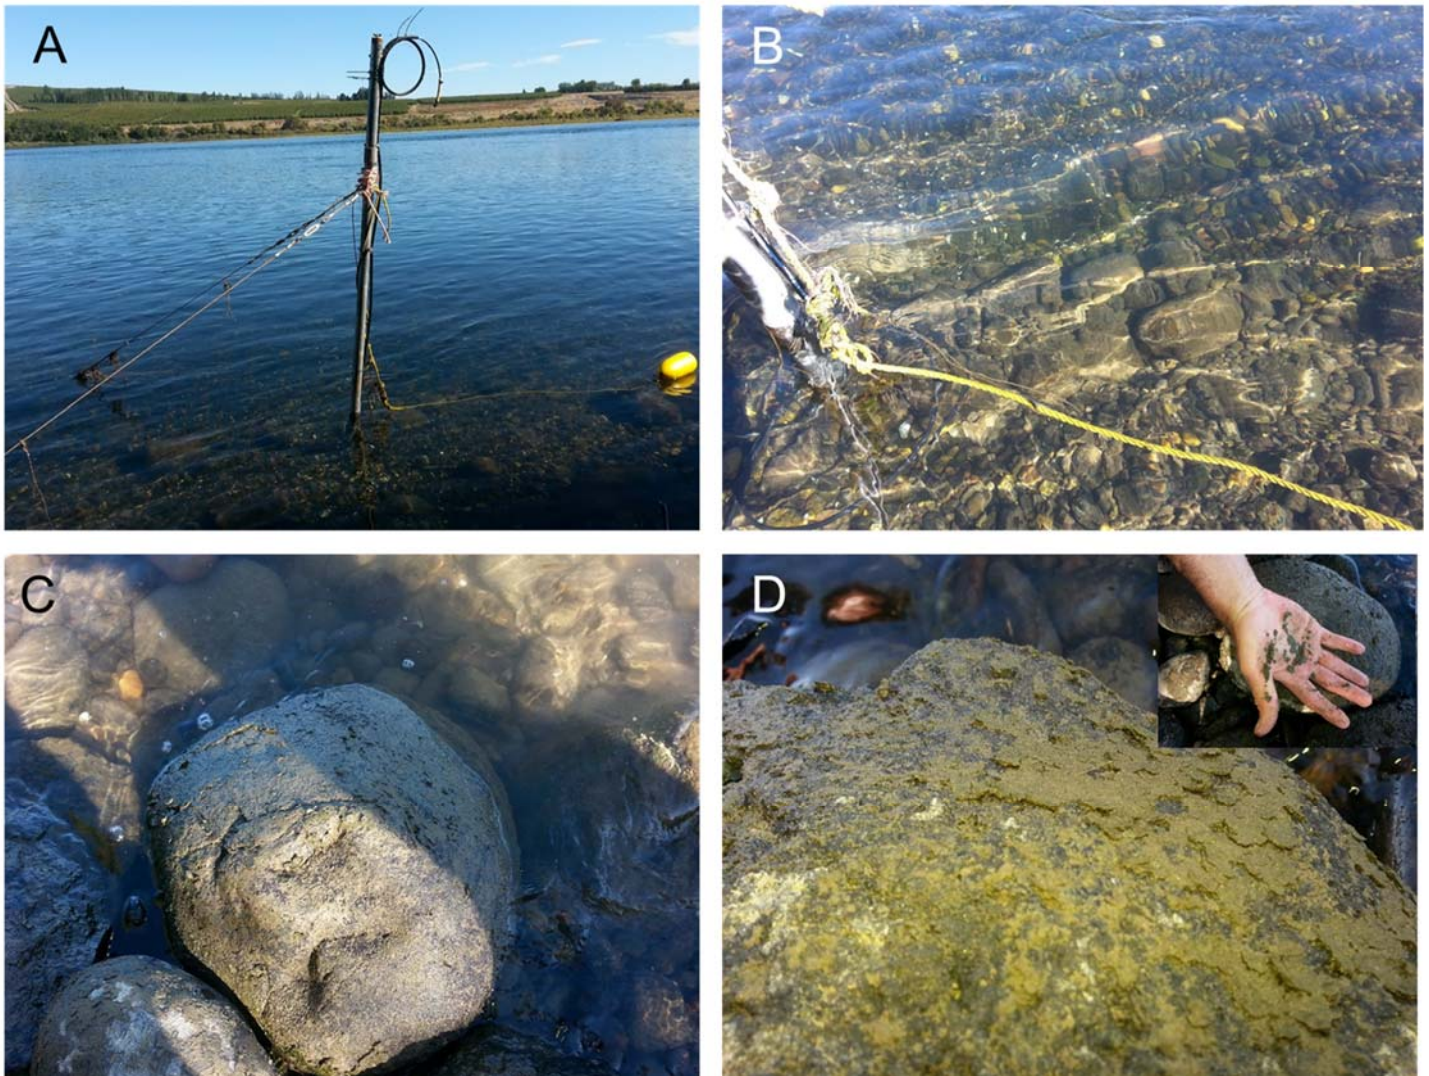

Figure S4. Photos of near-shore riverbed environment at the Hanford 300 Area. (A) View from the north side of the Columbia River, illustrating the location of piezometer T3. (B) Close up of the riverbed gravel layer. (C) A large, periphyton-coated gravel stone. (D) Close up of the periphyton-coated gravel stone, illustrating the presence of abundant photosynthetic biomass. The inset in (D) shows periphyton material loosely-associated with the gravel stone.

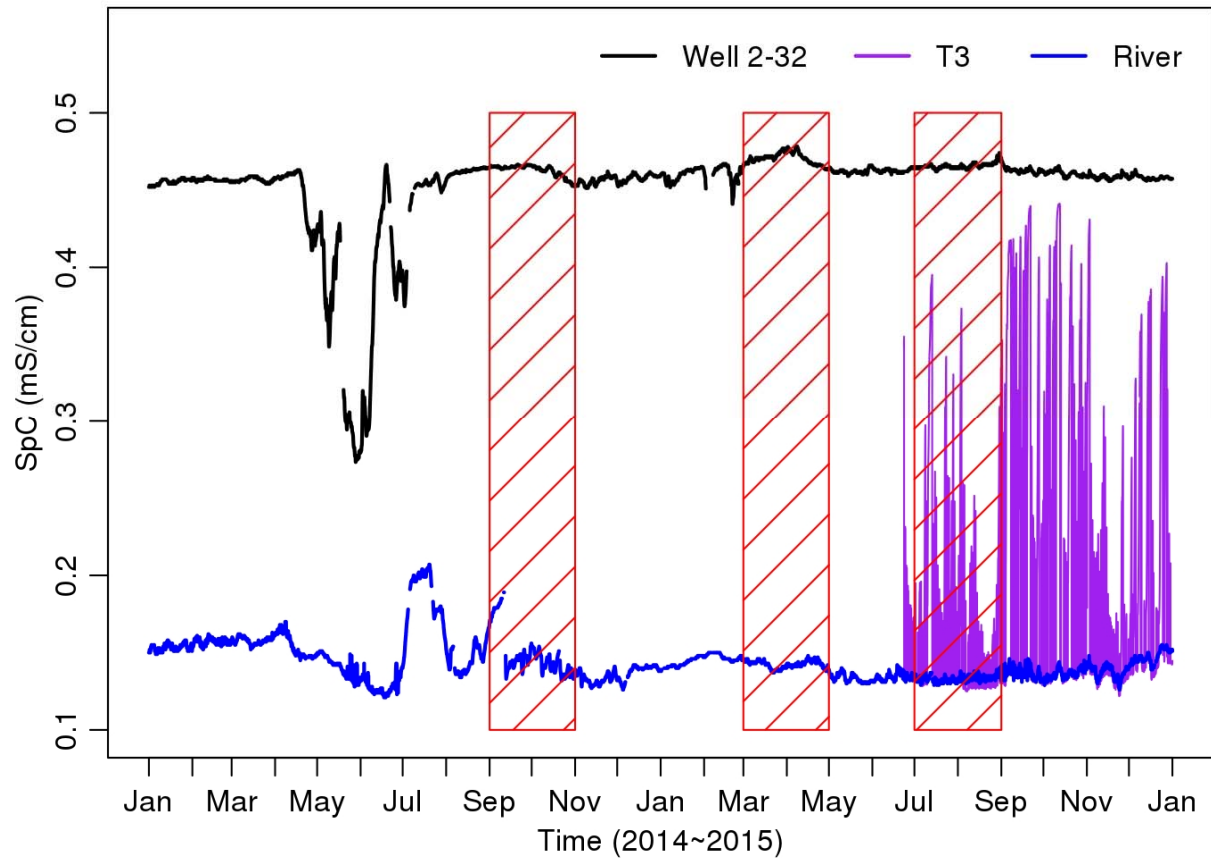

Figure S5. Specific conductivity (SpC) of groundwater well 2-32, piezometer T3, and river water during 2014-2015 (data for piezometer T3 are available only the second half of 2015). Results are hourly measurements from a data logger connected to an *in situ* conductivity probe. The hatched orange rectangles indicate the times of *in situ* sand pack deployment. The frequent variation in piezometer fluid SpC indicates extensive river water-groundwater mixing.

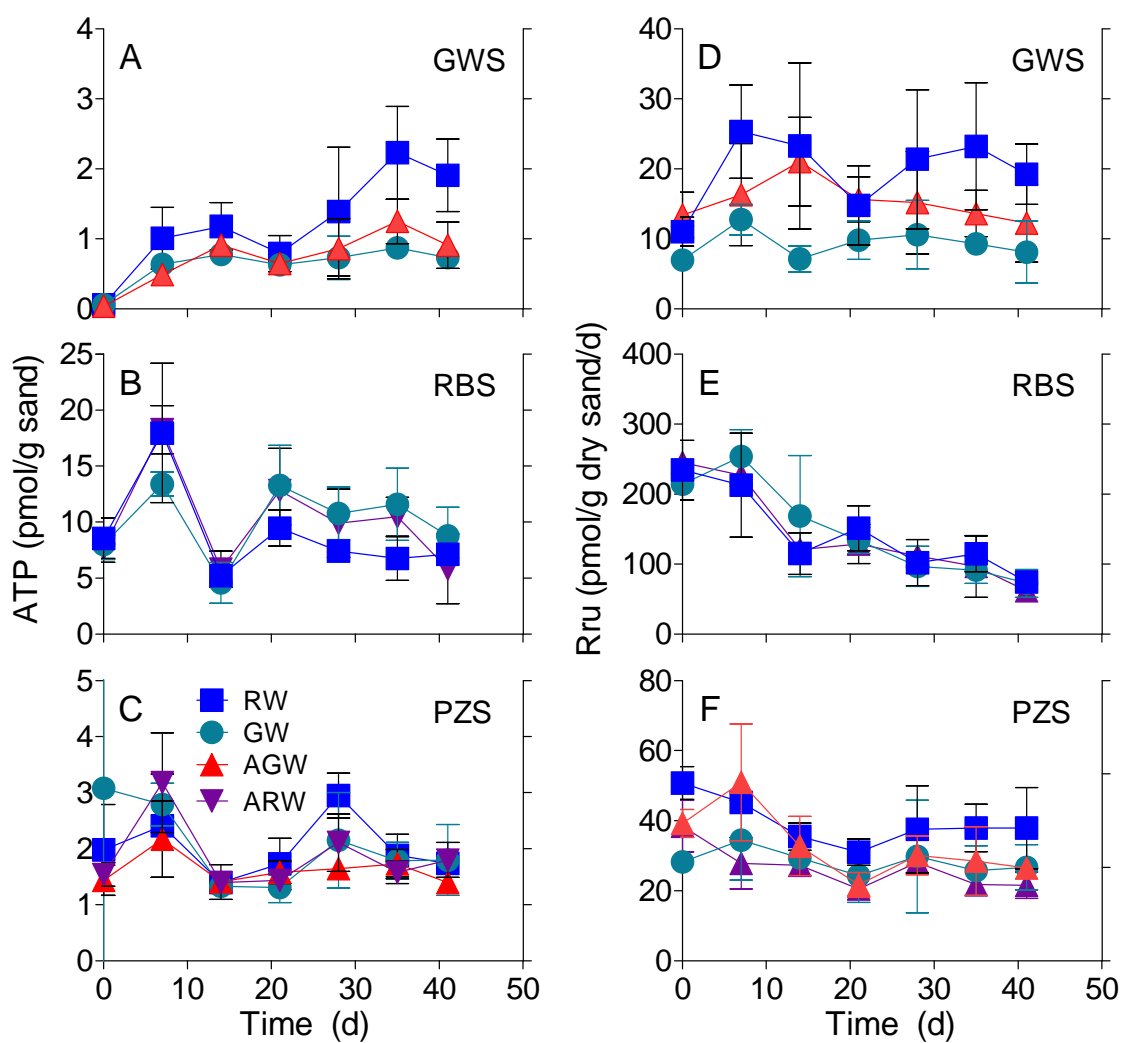

Figure S6. ATP content and rates of resazurin transformation to resorufin for the groundwater (A, D), riverbed (B, E), and piezometer (C, F) sand colonized reactors for Cross feed experiment 2. Each data point shows the mean  $\pm$  SD or range of triplicate or duplicate



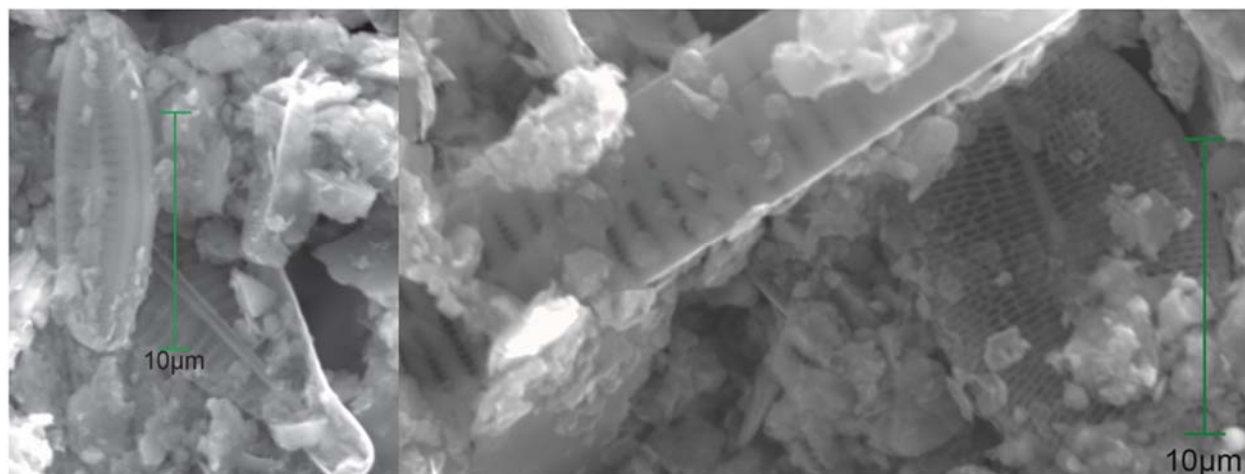

Figure S7. SEM images of diatom frustules in RBS material.

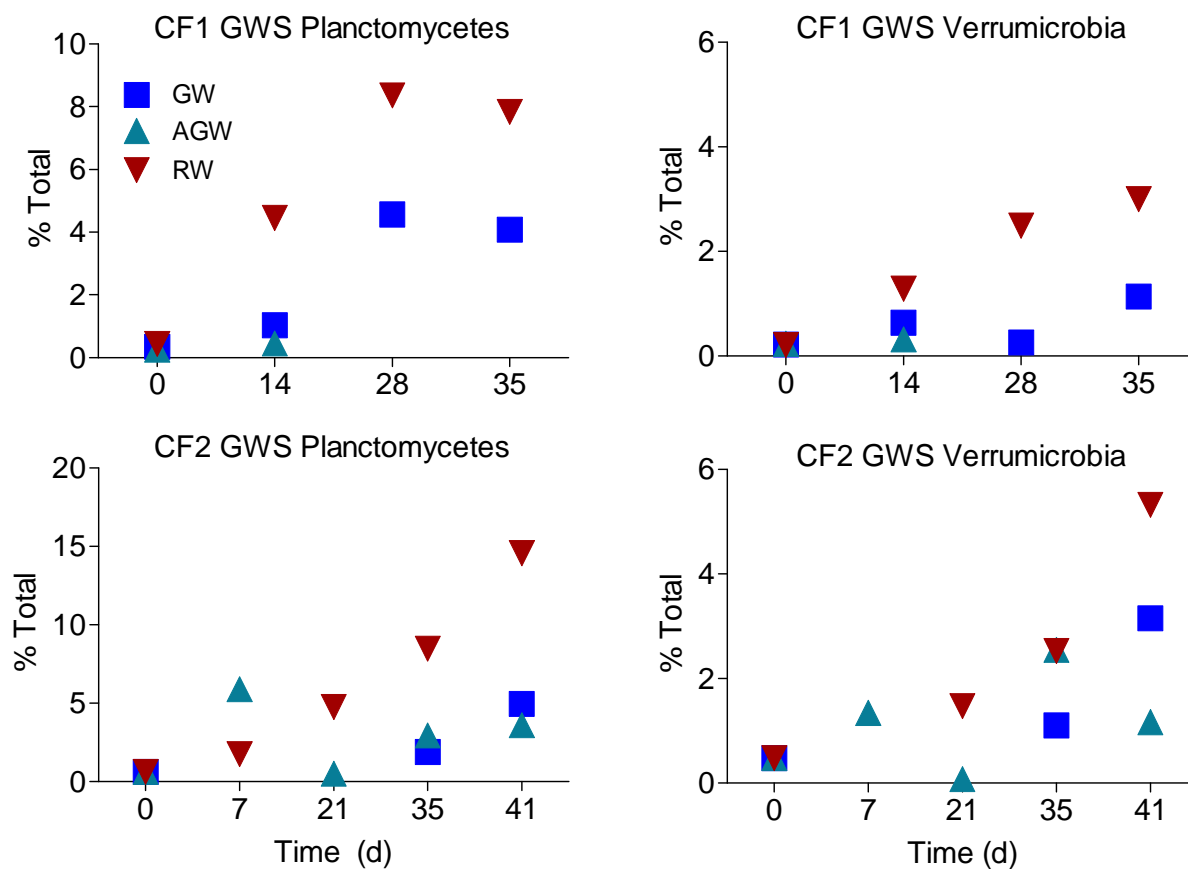

Figure S8. Relative abundance of *Planctomycetes* and *Verrumicrobia* in the CF1 and CF2 GWS reactors exposed to different fluid types (GW, AGW, or RW). Each symbol represents results from a single 16S rRNA gene amplicon library.

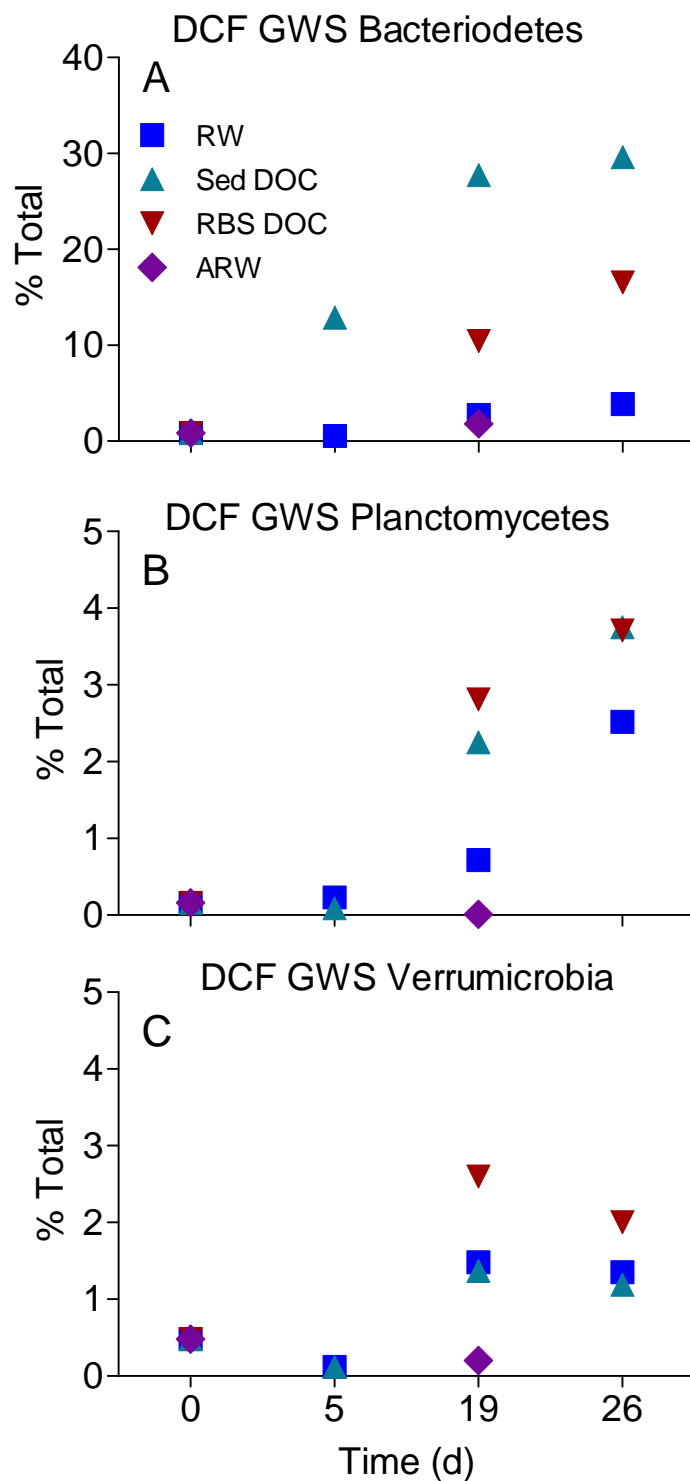

Figure S9. Relative abundance of *Bacteroidetes* (A), *Planctomycetes* (B), and *Verrumicrobia* (C) in the DCF GWS reactors exposed to different fluid types (RW, Sed DOC, RBS DOC, or ARW). Each symbol represents results from a single 16S rRNA gene amplicon library.

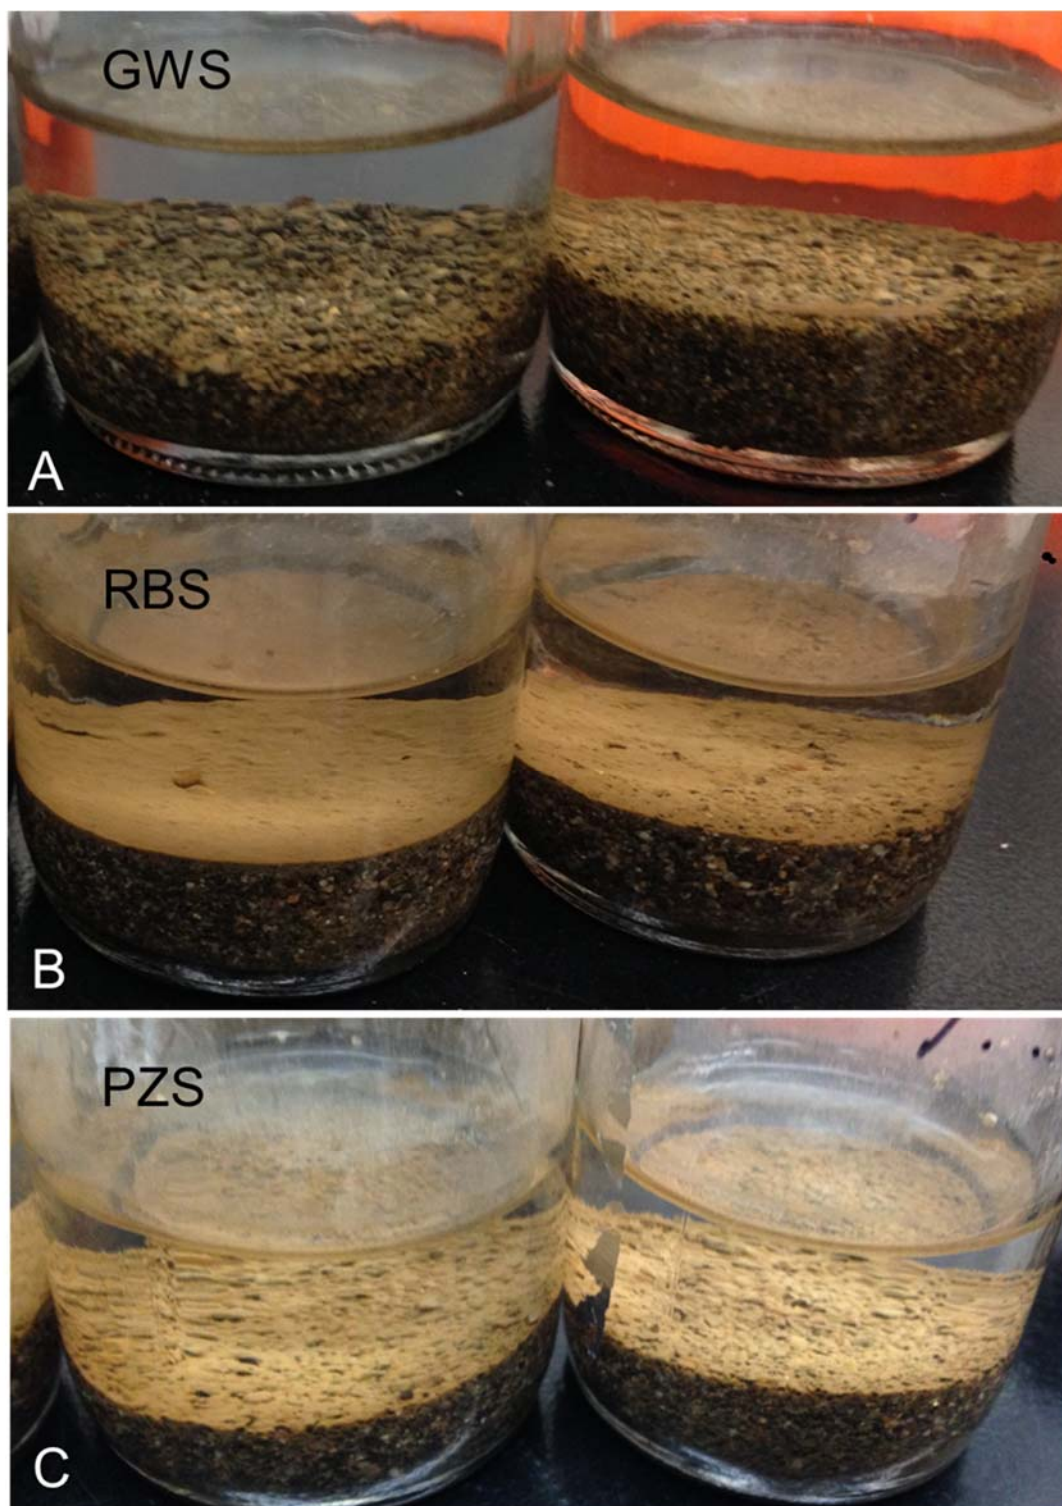

Figure S10. Photos of GWS, RBS, and PZS reactors at the start of CF1. Note the presence of fine-grained materials on the surface the RBS, which are less abundant in the PZS and absent from the GWS.

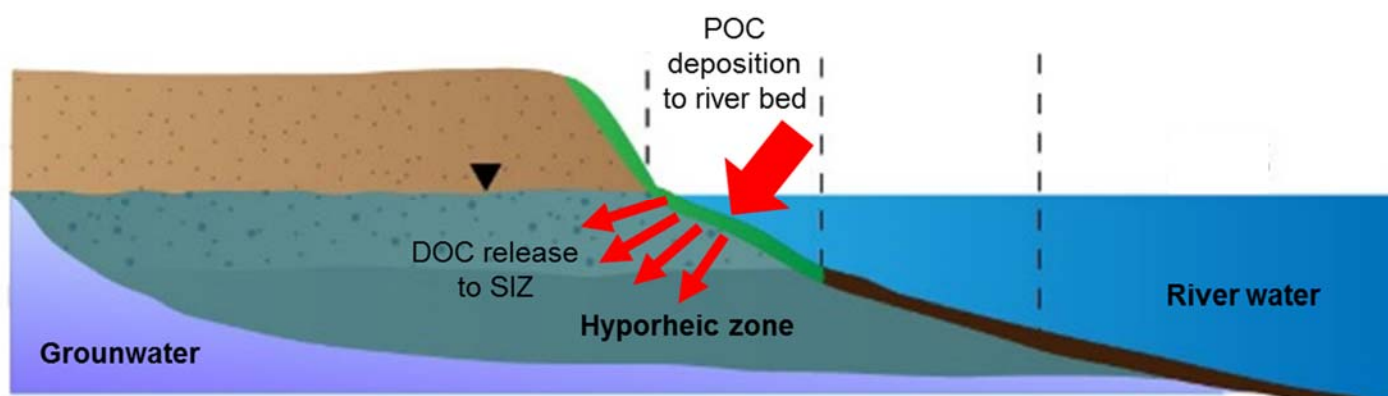

Figure S11. Conceptual illustration of a key biogeochemical implication of this study, i.e. the potential for hydrologically-driven input of labile POC in the form of river water and/or periphyton photosynthetic biomass into the riverbed, and for subsequent flux of DOC derived from that biomass into the HC.

Table S1. Pairwise reactor comparison for the cross feeding experiments. Only comparisons that were significant at  $P < 0.05$  are shown (all other comparisons were not significant).

| Treatment Comparison | Parameter                | Value  | Difference | p        |
|----------------------|--------------------------|--------|------------|----------|
| CF1 GWS+AGW          | Biomass <sup>a</sup>     | 0.53   | 0.20       | 0.0409   |
| CF1 GWS+GW           |                          | 0.33   |            |          |
| CF2 RWS+GW           | Biomass                  | 9.75   | 2.88       | 0.0307   |
| CF2 RWS+RW           |                          | 6.87   |            |          |
| CF2 GWS+RW           | Biomass                  | 1.62   | 0.87       | 2.99E-06 |
| CF2 GWS+GW           |                          | 0.75   |            |          |
| CF2 GWS+RW           | Biomass                  | 1.62   | 0.68       | 0.0009   |
| CF2 GWS+AGW          |                          | 0.94   |            |          |
| CF1 RWS+ARW          | Respiration <sup>b</sup> | 316.23 | 130.02     | 0.0374   |
| CF1 RWS+RW           |                          | 186.21 |            |          |
| CF2 GWS+RW           | Respiration              | 38.02  | 21.04      | 5.36E-06 |
| CF2 GWS+GW           |                          | 16.98  |            |          |
| CF2 GWS+AGW          | Respiration              | 26.30  | 9.32       | 0.0133   |
| CF2 GWS+GW           |                          | 16.98  |            |          |
| CF2 GWS+RW           | Respiration              | 38.02  | 11.72      | 0.0326   |
| CF2 GWS+AGW          |                          | 26.30  |            |          |
| CF2 PZS+RW           | Respiration              | 70.79  | 25.09      | 0.0127   |
| CF2 PZS+ARW          |                          | 45.71  |            |          |

<sup>a</sup> Units = pmol/g sand

<sup>b</sup> Units = pmol/g sand/48 hr

Table S2. Pairwise comparisons for the desorption/cross feeding experiment. Only comparisons that were significant at  $P < \sim 0.05$  are shown (all other comparisons were not significant).

| Treatment Comparison | Parameter                | Value  | Difference | p      |
|----------------------|--------------------------|--------|------------|--------|
| GWS+RW               | Biomass <sup>a</sup>     | 0.66   | 0.37       | 0.0064 |
| GWS+ARW              |                          | 0.29   |            |        |
| GWS+Sed DOC          | Biomass                  | 0.60   | 0.32       | 0.0138 |
| GWS+ARW              |                          | 0.29   |            |        |
| GWS+RBS DOC          | Biomass                  | 0.51   | 0.22       | 0.0571 |
| GWS+ARW              |                          | 0.29   |            |        |
| GWS+ Sed DOC         | Respiration <sup>b</sup> | 89.13  | 51.97      | 0.0021 |
| GWS+RW               |                          | 37.15  |            |        |
| GWS+RBS DOC          | Respiration              | 91.20  | 54.05      | 0.0015 |
| GWS+RW               |                          | 37.15  |            |        |
| PZS+ARW              | Respiration              | 97.72  | 45.24      | 0.0253 |
| PZS+RW               |                          | 52.48  |            |        |
| PZS+Sed DOC          | Respiration              | 109.65 | 57.17      | 0.0098 |
| PZS+RW               |                          | 52.48  |            |        |
| PZS+RBS DOC          | Respiration              | 120.23 | 67.75      | 0.0038 |
| PZS+RW               |                          | 52.48  |            |        |

<sup>a</sup> Units = pmol/g sand

<sup>b</sup> Units = pmol/g sand/48 hr

Table S3. Shannon and Simpson diversity indices for GWS, RBS, and PZS in the cross feeding experiments.

| Experiment | Shannon Index |      |      | Simpson Index |        |        |
|------------|---------------|------|------|---------------|--------|--------|
|            | GWS           | RBS  | PZS  | GWS           | RBS    | PZS    |
| CF1        | 4.44          | 7.34 | 6.80 | 0.0407        | 0.0027 | 0.0076 |
| CF2        | 4.97          | 7.47 | 6.83 | 0.0237        | 0.0024 | 0.0067 |
| DCF        | 4.21          | 7.17 | 6.73 | 0.0545        | 0.033  | 0.0064 |



Table S4. Relative abundance of families within the major Proteobacterial classes and select non-Proteobacterial phyla in CF1. For a given sand type, the number of OTU hits for each family was summed across all water types and divided by the total number of hits for the corresponding phylum. Only families that comprised  $\geq 0.1\%$  of the phylum are shown. The notations p\_, c\_, o\_, and f\_ refer to phylum, class, order, and family, respectively.

| Taxa                     | GWS % of Phylum | Taxa                     | RBS % of Phylum | Taxa                     | PZS % of Phylum |
|--------------------------|-----------------|--------------------------|-----------------|--------------------------|-----------------|
| <b>p__Proteobacteria</b> |                 | <b>p__Proteobacteria</b> |                 | <b>p__Proteobacteria</b> |                 |
| c__Alphaproteobacteria   | 17.407          | c__Alphaproteobacteria   | 28.080          | c__Alphaproteobacteria   | 32.021          |
| f__Unclassified          | 3.155           | f__Unclassified          | 8.941           | f__Unclassified          | 12.211          |
| f__Acetobacteraceae      | 2.993           | f__Rhodobacteraceae      | 5.373           | f__Sphingomonadaceae     | 4.265           |
| f__Aurantimonadaceae     | 1.870           | f__Sphingomonadaceae     | 4.819           | f__Hyphomicrobiaceae     | 3.614           |
| f__Beijerinckiaceae      | 1.661           | f__Hyphomicrobiaceae     | 4.142           | f__Rhodobacteraceae      | 3.492           |
| f__Bradyrhizobiaceae     | 1.555           | f__Rhodospirillaceae     | 1.717           | f__Rhodospirillaceae     | 2.458           |
| f__Brucellaceae          | 1.488           | f__Hyphomonadaceae       | 0.717           | f__Phyllobacteriaceae    | 2.144           |
| f__Caulobacteraceae      | 1.484           | f__Phyllobacteriaceae    | 0.695           | f__Bradyrhizobiaceae     | 0.961           |
| f__Erythrobacteraceae    | 1.034           | f__Caulobacteraceae      | 0.455           | f__Hyphomonadaceae       | 0.951           |
| f__Holosporaceae         | 0.654           | f__Methylocystaceae      | 0.275           | f__Caulobacteraceae      | 0.642           |
| f__Hyphomicrobiaceae     | 0.579           | f__Bradyrhizobiaceae     | 0.231           | f__Rhizobiaceae          | 0.626           |
| f__Hyphomonadaceae       | 0.298           | f__Acetobacteraceae      | 0.199           | f__Acetobacteraceae      | 0.219           |
| f__Methylobacteriaceae   | 0.249           | f__Rhizobiaceae          | 0.129           | f__Pelagibacteraceae     | 0.132           |
| f__Methylocystaceae      | 0.225           |                          |                 | f__Methylocystaceae      | 0.107           |
|                          |                 |                          |                 |                          |                 |
| c__Betaproteobacteria    | 46.058          | c__Betaproteobacteria    | 24.176          | c__Betaproteobacteria    | 30.194          |
| f__Comamonadaceae        | 22.621          | f__Unclassified          | 12.340          | f__Methylophilaceae      | 11.837          |
| f__Methylophilaceae      | 18.323          | f__Comamonadaceae        | 4.631           | f__Comamonadaceae        | 7.552           |
| f__Rhodocyclaceae        | 2.753           | f__Methylophilaceae      | 2.518           | f__Unclassified          | 7.416           |
| f__Unclassified          | 1.051           | f__Alcaligenaceae        | 1.636           | f__Rhodocyclaceae        | 2.109           |
| f__Oxalobacteraceae      | 0.651           | f__Rhodocyclaceae        | 1.620           | f__Oxalobacteraceae      | 0.464           |
| f__Nitrosomonadaceae     | 0.268           | f__Oxalobacteraceae      | 0.594           | f__Alcaligenaceae        | 0.395           |
| f__Hydrogenophilaceae    | 0.179           | f__Neisseriaceae         | 0.282           | f__Neisseriaceae         | 0.170           |
| f__Gallionellaceae       | 0.105           |                          |                 |                          |                 |
|                          |                 |                          |                 |                          |                 |
| c__Deltaproteobacteria   | 2.157           | c__Deltaproteobacteria   | 13.804          | c__Deltaproteobacteria   | 6.960           |
| f__Unclassified          | 0.909           | f__Unclassified          | 5.921           | f__Unclassified          | 2.653           |
| f__OM27                  | 0.772           | f__Syntrophobacteraceae  | 2.373           | f__Syntrophobacteraceae  | 1.240           |
| f__Bdellovibrionaceae    | 0.228           | f__Geobacteraceae        | 0.986           | f__Haliangiaceae         | 0.790           |
| f__Haliangiaceae         | 0.113           | f__Haliangiaceae         | 0.668           | f__Bdellovibrionaceae    | 0.496           |

|                        |                 |                        |                 |                           |                 |
|------------------------|-----------------|------------------------|-----------------|---------------------------|-----------------|
|                        |                 | f__Myxococcaceae       | 0.583           | f__OM27                   | 0.462           |
|                        |                 | f__JTB38               | 0.566           | f__JTB38                  | 0.380           |
|                        |                 | f__Bdellovibrionaceae  | 0.426           | f__Cystobacterineae       | 0.264           |
|                        |                 | f__Desulfuromonadaceae | 0.296           | f__Nannocystaceae         | 0.113           |
|                        |                 | f__Desulfobulbaceae    | 0.260           |                           |                 |
|                        |                 | f__OM27                | 0.250           |                           |                 |
|                        |                 | f__Polyangiaceae       | 0.246           |                           |                 |
|                        |                 | f__MND4                | 0.243           |                           |                 |
|                        |                 | f__NB1-i               | 0.200           |                           |                 |
|                        |                 | f__Cystobacterineae    | 0.180           |                           |                 |
|                        |                 | f__Bacteriovoracaceae  | 0.158           |                           |                 |
|                        |                 | f__Desulfobacteraceae  | 0.112           |                           |                 |
|                        |                 |                        |                 |                           |                 |
| c__Gammaproteobacteria | 34.331          | c__Gammaproteobacteria | 32.945          | c__Gammaproteobacteria    | 30.456          |
| f__Pseudomonadaceae    | 27.772          | f__Sinobacteraceae     | 7.775           | f__Pseudomonadaceae       | 10.695          |
| f__Sinobacteraceae     | 2.499           | f__Xanthomonadaceae    | 7.408           | f__Unclassified           | 2.982           |
| f__Unclassified        | 1.007           | f__Unclassified        | 4.248           | f__Sinobacteraceae        | 2.641           |
| f__Alteromonadaceae    | 0.471           | f__Piscirickettsiaceae | 3.574           | f__Xanthomonadaceae       | 2.310           |
| f__Moraxellaceae       | 0.278           | f__Coxiellaceae        | 2.673           | f__Ectothiorhodospiraceae | 2.030           |
| f__Legionellaceae      | 0.259           | f__Pseudomonadaceae    | 2.032           | f__Moraxellaceae          | 1.715           |
| f__Coxiellaceae        | 0.255           | f__Marinicellaceae     | 1.235           | f__Alteromonadaceae       | 1.332           |
| f__Chromatiaceae       | 0.253           | f__OM60                | 1.000           | f__Piscirickettsiaceae    | 1.143           |
| f__Oleiphilaceae       | 0.213           | f__Legionellaceae      | 0.699           | f__Coxiellaceae           | 1.023           |
| f__Xanthomonadaceae    | 0.121           | f__125ds10             | 0.518           | f__125ds10                | 0.920           |
|                        |                 | f__Moraxellaceae       | 0.504           | f__Marinicellaceae        | 0.785           |
|                        |                 | f__Crenotrichaceae     | 0.390           | f__Legionellaceae         | 0.380           |
|                        |                 | f__HTCC2089            | 0.248           | f__OM60                   | 0.341           |
|                        |                 |                        |                 | f__HTCC2188               | 0.229           |
|                        |                 |                        |                 | f__HTCC2089               | 0.103           |
|                        |                 |                        |                 |                           |                 |
| <b>p_Acidobacteria</b> | GWS % of Phylum | <b>p_Acidobacteria</b> | RBS % of Phylum | <b>p_Acidobacteria</b>    | PZS % of Phylum |
| c__Chloracidobacteria  | 46.481          | c__Chloracidobacteria  | 39.80261        | c__Chloracidobacteria     | 29.080          |
| f__Ellin6075           | 42.640          | f__Ellin6075           | 33.66153        | f__Ellin6075              | 25.325          |
| f__Unclassified        | 3.828           | f__Unclassified        | 6.12575         | f__Unclassified           | 3.748           |
|                        |                 |                        |                 |                           |                 |
| c__Acidobacteria-6     | 44.881          | c__Acidobacteria-6     | 40.29668        | c__Acidobacteria-6        | 46.767          |

|                         |                 |                         |                 |                         |                 |
|-------------------------|-----------------|-------------------------|-----------------|-------------------------|-----------------|
| f__mb2424               | 30.869          | f__Unclassified         | 25.13737        | f__Unclassified         | 31.242          |
| f__Unclassified         | 13.527          | f__mb2424               | 7.94873         | f__mb2424               | 8.656           |
| f__RB40                 | 0.485           | f__RB40                 | 7.20822         | f__RB40                 | 6.869           |
|                         |                 |                         |                 |                         |                 |
| c__Holophagae           | 5.204           | c__Holophagae           | 2.66255         | c__Holophagae           | 1.173           |
| f__Holophagaceae        | 5.204           | f__Holophagaceae        | 2.65665         | f__Holophagaceae        | 1.096           |
|                         |                 |                         |                 |                         |                 |
| c__Sva0725              | 0.459           | c__Sva0725              | 3.98439         | c__Sva0725              | 4.347           |
| f__Unclassified         | 0.459           | f__Unclassified         | 3.98439         | f__Unclassified         | 4.347           |
|                         |                 |                         |                 |                         |                 |
| c__RB25                 | 0.406           | c__RB25                 | 2.94201         | c__RB25                 | 4.308           |
| f__Unclassified         | 0.406           | f__Unclassified         | 2.94201         | f__Unclassified         | 4.308           |
|                         |                 |                         |                 |                         |                 |
| c__iii1-8               | 0.223           | c__iii1-8               | 4.16598         | c__iii1-8               | 3.140           |
| f__Unclassified         | 0.223           | f__Unclassified         | 4.13414         | f__Unclassified         | 3.134           |
|                         |                 |                         |                 |                         |                 |
| <b>p__Bacteroidetes</b> | GWS % of Phylum | <b>p__Bacteroidetes</b> | RBS % of Phylum | <b>p__Bacteroidetes</b> | PZS % of Phylum |
| c__Saprospirae          | 19.111          | c__Saprospirae          | 49.964          | c__Saprospirae          | 32.061          |
| f__Unclassified         | 0.000           | f__Saprospiraceae       | 36.402          | f__Chitinophagaceae     | 21.943          |
| f__Saprospiraceae       | 1.829           | f__Saprospiraceae       | 12.597          | f__Saprospiraceae       | 9.656           |
| f__Chitinophagaceae     | 17.282          | f__Unclassified         | 0.965           | f__Unclassified         | 0.463           |
|                         |                 |                         |                 |                         |                 |
| c__Flavobacteriia       | 45.843          | c__Flavobacteriia       | 20.249          | c__Flavobacteriia       | 25.117          |
| f__Flavobacteriaceae    | 26.054          | f__Flavobacteriaceae    | 18.139          | f__Flavobacteriaceae    | 17.745          |
| f__Cryomorphaceae       | 19.781          | f__Cryomorphaceae       | 2.096           | f__Cryomorphaceae       | 7.354           |
|                         |                 |                         |                 |                         |                 |
| c__Sphingobacteriia     | 15.951          | c__Sphingobacteriia     | 15.139          | c__Sphingobacteriia     | 22.377          |
| f__Unclassified         | 15.934          | f__Unclassified         | 15.044          | f__Unclassified         | 22.284          |
|                         |                 |                         |                 |                         |                 |
| c__Cytophagia           | 3.855           | c__Cytophagia           | 11.823          | c__Cytophagia           | 18.890          |
| f__Cytophagaceae        | 3.839           | f__Cytophagaceae        | 11.539          | f__Cytophagaceae        | 18.726          |
|                         |                 | f__Amoebophilaceae      | 0.263           |                         |                 |
| c__Bacteroidia          | 7.612           | c__Bacteroidia          | 1.780           | c__Bacteroidia          | 0.402           |
| f__Marinilabiaceae      | 4.574           | f__Unclassified         | 1.392           | f__Unclassified         | 0.174           |
| f__Unclassified         | 1.870           | f__SB-1                 | 0.193           |                         |                 |

|                              |                 |                              |                 |                              |                 |
|------------------------------|-----------------|------------------------------|-----------------|------------------------------|-----------------|
| f__Rikenellaceae             | 0.931           |                              |                 |                              |                 |
| f__S24-7                     | 0.237           |                              |                 |                              |                 |
|                              |                 |                              |                 |                              |                 |
| <b>p__Cyanobacteria</b>      | GWS % of Phylum | <b>p__Cyanobacteria</b>      | RBS % of Phylum | <b>p__Cyanobacteria</b>      | PZS % of Phylum |
| c__Chloroplast               | 7.419           | c__Chloroplast               | 94.049          | c__Chloroplast               | 71.560          |
| o__Streptophyta              | 5.906           | o__Stramenopiles             | 93.168          | o__Stramenopiles             | 69.791          |
| o__Stramenopiles             | 1.513           | o__Chlorophyta               | 0.634           | o__Chlorophyta               | 1.084           |
|                              |                 | o__Streptophyta              | 0.232           | o__Streptophyta              | 0.561           |
| f__Unclassified              | 7.419           | f__Unclassified              | 93.499          | f__Unclassified              | 70.700          |
|                              |                 | f__Chlamydomonadaceae        | 0.537           | f__Chlamydomonadaceae        | 0.785           |
|                              |                 |                              |                 |                              |                 |
| c__ML635J-21                 | 88.335          | c__ML635J-21                 | 2.142           | c__ML635J-21                 | 19.039          |
| f__Unclassified              | 88.335          | f__Unclassified              | 2.142           | f__Unclassified              | 19.039          |
|                              |                 |                              |                 |                              |                 |
| c__4C0d-2                    | 4.237           | c__4C0d-2                    | 2.103           | c__4C0d-2                    | 5.729           |
| f__Unclassified              | 4.237           | f__Unclassified              | 2.103           | f__Unclassified              | 5.729           |
|                              |                 |                              |                 |                              |                 |
|                              |                 | c__Synechococcophycideae     | 1.325           | c__Synechococcophycideae     | 3.469           |
|                              |                 | f__Synechococcaceae          | 1.141           | f__Synechococcaceae          | 3.411           |
|                              |                 |                              |                 |                              |                 |
| <b>p__Nitrospiraea</b>       | GWS % of Phylum | <b>p__Nitrospiraea</b>       | RBS % of Phylum | <b>p__Nitrospiraea</b>       | PZS % of Phylum |
| c__Nitrospira                | 100.000         | c__Nitrospira                | 100.000         | c__Nitrospira                | 100.000         |
| f__Nitrospiraceae            | 98.408          | f__Nitrospiraceae            | 89.446          | f__Nitrospiraceae            | 92.481          |
| f__0319-6A21                 | 0.628           | f__0319-6A21                 | 7.919           | f__0319-6A21                 | 6.713           |
| f__Thermodesulfovibrionaceae | 0.597           | f__Thermodesulfovibrionaceae | 2.287           | f__Leptospirillaceae         | 0.327           |
| f__Unclassified              | 0.322           | f__FW                        | 0.323           | f__Unclassified              | 0.265           |
|                              |                 |                              |                 | f__Thermodesulfovibrionaceae | 0.214           |
|                              |                 |                              |                 |                              |                 |
| <b>p__Planctomycetes</b>     | GWS % of Phylum | <b>p__Planctomycetes</b>     | RBS % of Phylum | <b>p__Planctomycetes</b>     | PZS % of Phylum |
| c__Planctomycetia            | 92.642          | c__Planctomycetia            | 89.916          | c__Planctomycetia            | 78.868          |
| f__Planctomycetaceae         | 67.862          | f__Gemmataceae               | 34.411          | f__Gemmataceae               | 31.293          |
| f__Gemmataceae               | 18.651          | f__Pirellulaceae             | 33.514          | f__Pirellulaceae             | 26.308          |
| f__Pirellulaceae             | 5.609           | f__Planctomycetaceae         | 16.059          | f__Planctomycetaceae         | 16.834          |
| f__Isosphaeraceae            | 0.415           | f__Isosphaeraceae            | 5.143           | f__Isosphaeraceae            | 3.870           |

|                        |                 |                        |                 |                        |                 |
|------------------------|-----------------|------------------------|-----------------|------------------------|-----------------|
| f__Unclassified        | 0.104           | f__Unclassified        | 0.788           | f__Unclassified        | 0.563           |
|                        |                 |                        |                 |                        |                 |
| c__Phycisphaerae       | 1.564           | c__Phycisphaerae       | 4.352           | c__Phycisphaerae       | 4.648           |
| f__Unclassified        | 0.585           | f__Unclassified        | 4.331           | f__Unclassified        | 4.590           |
| f__Phycisphaeraceae    | 0.978           |                        |                 |                        |                 |
|                        |                 |                        |                 |                        |                 |
| c__OM190               | 3.535           | c__OM190               | 2.587           | c__OM190               | 8.005           |
| f__Unclassified        | 3.535           | f__Unclassified        | 2.587           | f__Unclassified        | 8.005           |
|                        |                 |                        |                 |                        |                 |
| c__BD7-11              | 1.349           | c__BD7-11              | 0.557           | c__BD7-11              | 4.027           |
| f__                    | 1.349           | f__                    | 0.557           | f__                    | 4.027           |
|                        |                 |                        |                 |                        |                 |
| c__vadinHA49           | 0.163           | c__vadinHA49           | 0.929           | c__vadinHA49           | 2.359           |
| f__Unclassified        | 0.163           | f__Unclassified        | 0.929           | f__Unclassified        | 2.359           |
|                        |                 |                        |                 |                        |                 |
| <b>p_Verrumicrobia</b> | GWS % of Phylum | <b>p_Verrumicrobia</b> | RBS % of Phylum | <b>p_Verrumicrobia</b> | PZS % of Phylum |
| c__Pedosphaerae        | 75.022          | c__Pedosphaerae        | 34.924          | c__Pedosphaerae        | 61.473          |
| f__Ellin517            | 44.158          | f__auto67_4W           | 15.616          | f__Unclassified        | 24.152          |
| f__Unclassified        | 19.356          | f__Unclassified        | 12.522          | f__auto67_4W           | 13.660          |
| f__R4-41B              | 4.762           | f__R4-41B              | 2.629           | f__Ellin517            | 12.132          |
| f__auto67_4W           | 3.219           | f__Ellin515            | 2.209           | f__R4-41B              | 6.592           |
| f__Pedosphaeraceae     | 0.772           | f__Ellin517            | 0.833           | f__Ellin515            | 1.425           |
| f__Ellin515            | 0.639           | f__Pedosphaeraceae     | 0.168           | f__Pedosphaeraceae     | 1.050           |
|                        |                 |                        |                 |                        |                 |
| c__Spartobacteria      | 4.277           | c__Spartobacteria      | 19.842          | c__Spartobacteria      | 7.239           |
| f__Chthoniobacteraceae | 4.277           | f__Chthoniobacteraceae | 19.827          | f__Chthoniobacteraceae | 7.239           |
|                        |                 |                        |                 |                        |                 |
| c__Verrucomicrobiae    | 5.732           | c__Verrucomicrobiae    | 31.255          | c__Verrucomicrobiae    | 10.073          |
| f__Verrucomicrobiaceae | 5.732           | f__Verrucomicrobiaceae | 31.255          | f__Verrucomicrobiaceae | 10.073          |
|                        |                 |                        |                 |                        |                 |
| c__Opitutae            | 14.683          | c__Opitutae            | 6.408           | c__Opitutae            | 16.440          |
| f__Opitutaceae         | 14.683          | f__Opitutaceae         | 6.237           | f__Opitutaceae         | 16.224          |
|                        |                 | f__Cerasiococcaceae    | 0.105           | f__Cerasiococcaceae    | 0.182           |
|                        |                 |                        |                 |                        |                 |
| c__Verruco-5           | 0.132           | c__Verruco-5           | 3.042           | c__Verruco-5           | 1.366           |

|                        |                 |                        |                 |                        |                 |
|------------------------|-----------------|------------------------|-----------------|------------------------|-----------------|
| f__Unclassified        | 0.132           | f__Unclassified        | 3.030           | f__Unclassified        | 1.355           |
|                        |                 |                        |                 |                        |                 |
| c__Methylacidiphilae   | 0.154           | c__Methylacidiphilae   | 1.897           | c__Methylacidiphilae   | 2.133           |
| f__Unclassified        | 0.154           | f__Unclassified        | 1.885           | f__Unclassified        | 2.049           |
|                        |                 |                        |                 |                        |                 |
| <b>p_Crenarchaeota</b> | GWS % of Phylum | <b>p_Crenarchaeota</b> | RBS % of Phylum | <b>p_Crenarchaeota</b> | PZS % of Phylum |
| c__Thaumarchaeota      | 100.000         | c__Thaumarchaeota      | 99.975          | c__Thaumarchaeota      | 99.984          |
| f__Cenarchaeaceae      | 95.667          | f__Cenarchaeaceae      | 86.344          | f__Cenarchaeaceae      | 95.610          |
| f__Nitrososphaeraceae  | 3.298           | f__Nitrososphaeraceae  | 13.403          | f__Nitrososphaeraceae  | 2.168           |
| f__SAGMA-X             | 1.035           | f__SAGMA-X             | 0.228           | f__SAGMA-X             | 2.156           |

Table S5. Relative abundance of families within the major Proteobacterial classes and select non-Proteobacterial phyla in CF2. For a given sand type, the number of OTU hits for each family was summed across all water types and divided by the total number of hits for the corresponding phylum. Only families that comprised  $\geq 0.1\%$  of the phylum are shown. The notations p\_, c\_, o\_, and f\_ refer to phylum, class, order, and family, respectively.

| Taxa                     | GWS % of Phylum | Taxa                     | RBS % of Phylum | Taxa                     | PZS % of Phylum |
|--------------------------|-----------------|--------------------------|-----------------|--------------------------|-----------------|
| <b>p__Proteobacteria</b> |                 | <b>p__Proteobacteria</b> |                 | <b>p__Proteobacteria</b> |                 |
| c__Alphaproteobacteria   | 20.411          | c__Alphaproteobacteria   | 22.694          | c__Alphaproteobacteria   | 24.836          |
| f__Unclassified          | 5.079           | f__Unclassified          | 7.657           | f__Unclassified          | 7.991           |
| f__Sphingomonadaceae     | 2.196           | f__Rhodobacteraceae      | 3.849           | f__Hyphomicrobiaceae     | 3.382           |
| f__Caulobacteraceae      | 2.115           | f__Sphingomonadaceae     | 3.174           | f__Rhodobacteraceae      | 2.976           |
| f__Hyphomicrobiaceae     | 1.934           | f__Hyphomicrobiaceae     | 2.574           | f__Sphingomonadaceae     | 2.667           |
| f__Rhodospirillaceae     | 1.901           | f__Rhodospirillaceae     | 2.436           | f__Rhodospirillaceae     | 2.492           |
| f__Rhodobacteraceae      | 1.449           | f__Hyphomonadaceae       | 1.531           | f__Hyphomonadaceae       | 1.664           |
| f__Bradyrhizobiaceae     | 1.412           | f__Phyllobacteriaceae    | 0.334           | f__Phyllobacteriaceae    | 0.913           |
| f__Phyllobacteriaceae    | 1.362           | f__Acetobacteraceae      | 0.255           | f__Rhizobiaceae          | 0.763           |
| f__Beijerinckiaceae      | 1.168           | f__Caulobacteraceae      | 0.245           | f__Bradyrhizobiaceae     | 0.704           |
| f__Hyphomonadaceae       | 1.150           | f__Methylocystaceae      | 0.132           | f__Caulobacteraceae      | 0.456           |
| f__Methylobacteriaceae   | 0.175           | f__Bradyrhizobiaceae     | 0.114           | f__Acetobacteraceae      | 0.221           |
| f__Acetobacteraceae      | 0.132           |                          |                 | f__Pelagibacteraceae     | 0.187           |
| f__Rhizobiaceae          | 0.107           |                          |                 | f__Methylocystaceae      | 0.115           |
|                          |                 |                          |                 |                          |                 |
| c__Betaproteobacteria    | 64.742          | c__Betaproteobacteria    | 32.082          | c__Betaproteobacteria    | 48.173          |
| f__Comamonadaceae        | 36.658          | f__Comamonadaceae        | 11.035          | f__Methylophilaceae      | 17.652          |
| f__Rhodocyclaceae        | 12.638          | f__Unclassified          | 7.746           | f__Comamonadaceae        | 16.960          |
| f__Methylophilaceae      | 11.723          | f__Rhodocyclaceae        | 6.556           | f__Unclassified          | 6.134           |
| f__Unclassified          | 1.830           | f__Methylophilaceae      | 3.832           | f__Rhodocyclaceae        | 5.753           |
| f__Hydrogenophilaceae    | 0.968           | f__Oxalobacteraceae      | 0.884           | f__Oxalobacteraceae      | 0.526           |
| f__Oxalobacteraceae      | 0.659           | f__Neisseriaceae         | 0.711           | f__Neisseriaceae         | 0.348           |
|                          |                 | f__Alcaligenaceae        | 0.385           | f__Alcaligenaceae        | 0.229           |
|                          |                 | f__Nitrosomonadaceae     | 0.141           |                          |                 |
|                          |                 |                          |                 |                          |                 |
| c__Deltaproteobacteria   | 3.018           | c__Deltaproteobacteria   | 17.268          | c__Deltaproteobacteria   | 10.948          |
| f__Unclassified          | 1.780           | f__Unclassified          | 7.726           | f__Unclassified          | 5.084           |
| f__OM27                  | 0.695           | f__Syntrophobacteraceae  | 1.937           | f__Syntrophobacteraceae  | 1.859           |
| f__Haliangiaceae         | 0.202           | f__Geobacteraceae        | 1.260           | f__Haliangiaceae         | 0.790           |
| f__Bdellovibrionaceae    | 0.162           | f__Haliangiaceae         | 0.933           | f__Bdellovibrionaceae    | 0.716           |

|                        |                        |                        |                        |                        |                        |
|------------------------|------------------------|------------------------|------------------------|------------------------|------------------------|
|                        |                        | f__Myxococcaceae       | 0.757                  | f__OM27                | 0.411                  |
|                        |                        | f__Bdellovibrionaceae  | 0.710                  | f__JTB38               | 0.368                  |
|                        |                        | f__Polyangiaceae       | 0.692                  | f__Cystobacterineae    | 0.322                  |
|                        |                        | f__OM27                | 0.620                  | f__Polyangiaceae       | 0.264                  |
|                        |                        | f__JTB38               | 0.333                  | f__Myxococcaceae       | 0.217                  |
|                        |                        | f__Bacteriovoracaceae  | 0.290                  | f__Nannocystaceae      | 0.204                  |
|                        |                        | f__NB1-i               | 0.263                  | f__Bacteriovoracaceae  | 0.192                  |
|                        |                        | f__MND4                | 0.227                  | f__Geobacteraceae      | 0.137                  |
|                        |                        | f__Cystobacterineae    | 0.158                  | f__MND4                | 0.122                  |
|                        |                        | f__Nannocystaceae      | 0.150                  |                        |                        |
|                        |                        | f__Desulfobulbaceae    | 0.125                  |                        |                        |
|                        |                        | f__Entotheonellaceae   | 0.114                  |                        |                        |
|                        |                        |                        |                        |                        |                        |
| c__Gammaproteobacteria | 11.746                 | c__Gammaproteobacteria | 27.104                 | c__Gammaproteobacteria | 15.743                 |
| f__Pseudomonadaceae    | 3.301                  | f__Pseudomonadaceae    | 5.911                  | f__Sinobacteraceae     | 2.906                  |
| f__Unclassified        | 2.485                  | f__Xanthomonadaceae    | 3.500                  | f__Unclassified        | 2.698                  |
| f__Alteromonadaceae    | 1.466                  | f__Sinobacteraceae     | 3.131                  | f__Coxiellaceae        | 1.578                  |
| f__Sinobacteraceae     | 1.253                  | f__Unclassified        | 2.800                  | f__Xanthomonadaceae    | 1.301                  |
| f__Moraxellaceae       | 1.052                  | f__OM60                | 2.112                  | f__OM60                | 1.196                  |
| f__Coxiellaceae        | 0.494                  | f__Piscirickettsiaceae | 2.021                  | f__Piscirickettsiaceae | 1.082                  |
| f__Oleiphilaceae       | 0.409                  | f__Coxiellaceae        | 1.914                  | f__Marinicellaceae     | 0.928                  |
| f__Chromatiaceae       | 0.381                  | f__Moraxellaceae       | 1.411                  | f__Pseudomonadaceae    | 0.894                  |
| f__Piscirickettsiaceae | 0.334                  | f__Marinicellaceae     | 1.226                  | f__Moraxellaceae       | 0.654                  |
| f__211ds20             | 0.162                  | f__Alteromonadaceae    | 0.668                  | f__Alteromonadaceae    | 0.604                  |
|                        |                        | f__125ds10             | 0.546                  | f__125ds10             | 0.502                  |
|                        |                        | f__Aeromonadaceae      | 0.413                  | f__HTCC2089            | 0.274                  |
|                        |                        | f__HTCC2089            | 0.399                  | f__Legionellaceae      | 0.248                  |
|                        |                        | f__Legionellaceae      | 0.177                  | f__HTCC2188            | 0.239                  |
|                        |                        | f__Crenotrichaceae     | 0.148                  | f__Crenotrichaceae     | 0.106                  |
|                        |                        | f__Chromatiaceae       | 0.131                  |                        |                        |
|                        |                        |                        |                        |                        |                        |
|                        |                        |                        |                        |                        |                        |
|                        |                        |                        |                        |                        |                        |
| <b>p_Acidobacteria</b> | <b>GWS % of Phylum</b> | <b>p_Acidobacteria</b> | <b>RBS % of Phylum</b> | <b>p_Acidobacteria</b> | <b>PZS % of Phylum</b> |
| c__Chloracidobacteria  | 28.734                 | c__Chloracidobacteria  | 34.223                 | c__Chloracidobacteria  | 33.659                 |
| f__Unclassified        | 16.795                 | f__Ellin6075           | 21.949                 | f__Ellin6075           | 23.417                 |
| f__Ellin6075           | 11.938                 | f__Unclassified        | 12.274                 | f__Unclassified        | 10.242                 |
|                        |                        |                        |                        |                        |                        |



|                         |                        |                         |                        |                         |                        |
|-------------------------|------------------------|-------------------------|------------------------|-------------------------|------------------------|
| c__Acidobacteria-6      | 54.426                 | c__Acidobacteria-6      | 32.994                 | c__Acidobacteria-6      | 37.981                 |
| f__mb2424               | 41.943                 | f__Unclassified         | 20.427                 | f__Unclassified         | 23.648                 |
| f__Unclassified         | 10.168                 | f__mb2424               | 7.054                  | f__mb2424               | 7.278                  |
| f__RB40                 | 2.315                  | f__RB40                 | 5.507                  | f__RB40                 | 7.056                  |
|                         |                        |                         |                        |                         |                        |
| c__Holophagae           | 1.316                  | c__Holophagae           | 10.919                 | c__Holophagae           | 1.561                  |
| f__Holophagaceae        | 1.316                  | f__Holophagaceae        | 10.669                 | f__Holophagaceae        | 1.471                  |
|                         |                        | f__Unclassified         | 0.249                  |                         |                        |
|                         |                        |                         |                        |                         |                        |
| c__Sva0725              | 0.272                  | c__Sva0725              | 3.267                  | c__Sva0725              | 3.992                  |
| f__Unclassified         | 0.272                  | f__Unclassified         | 3.267                  | f__Unclassified         | 3.992                  |
|                         |                        |                         |                        |                         |                        |
| c__RB25                 | 0.318                  | c__RB25                 | 4.724                  | c__RB25                 | 6.784                  |
| f__Unclassified         | 0.318                  | f__Unclassified         | 4.724                  | f__Unclassified         | 6.784                  |
|                         |                        |                         |                        |                         |                        |
| c__iii1-8               | 1.226                  | c__iii1-8               | 2.717                  | c__iii1-8               | 1.430                  |
| f__Unclassified         | 1.226                  | f__Unclassified         | 2.717                  | f__Unclassified         | 1.430                  |
|                         |                        |                         |                        |                         |                        |
| c__AT-s54               | 1.226                  | c__AT-s54               | 1.008                  | c__AT-s54               | 1.774                  |
| f__Unclassified         | 1.226                  | f__Unclassified         | 1.008                  | f__Unclassified         | 1.774                  |
|                         |                        |                         |                        |                         |                        |
| <b>p__Bacteroidetes</b> | <b>GWS % of Phylum</b> | <b>p__Bacteroidetes</b> | <b>RBS % of Phylum</b> | <b>p__Bacteroidetes</b> | <b>PZS % of Phylum</b> |
| c__Saprospirae          | 54.813                 | c__Saprospirae          | 52.803                 | c__Saprospirae          | 41.912                 |
| f__Saprospiraceae       | 45.558                 | f__Chitinophagaceae     | 36.950                 | f__Chitinophagaceae     | 27.282                 |
| f__Chitinophagaceae     | 9.255                  | f__Saprospiraceae       | 14.805                 | f__Saprospiraceae       | 13.812                 |
|                         |                        | f__Unclassified         | 1.048                  | f__Unclassified         | 0.818                  |
|                         |                        |                         |                        |                         |                        |
| c__Sphingobacteriia     | 8.249                  | c__Sphingobacteriia     | 14.876                 | c__Sphingobacteriia     | 25.613                 |
| f__Unclassified         | 8.018                  | f__Unclassified         | 14.698                 | f__Unclassified         | 25.327                 |
| f__Sphingobacteriaceae  | 0.231                  | f__Sphingobacteriaceae  | 0.126                  | f__Sphingobacteriaceae  | 0.169                  |
|                         |                        |                         |                        |                         |                        |
| c__Cytophagia           | 9.503                  | c__Cytophagia           | 14.775                 | c__Cytophagia           | 21.380                 |
| f__Cytophagaceae        | 9.486                  | f__Cytophagaceae        | 14.484                 | f__Cytophagaceae        | 20.926                 |
| f__Cyclobacteriaceae    | 0.008                  | f__Amoebophilaceae      | 0.123                  | f__Flammeovirgaceae     | 0.281                  |
|                         |                        |                         |                        | f__Amoebophilaceae      | 0.101                  |
|                         |                        |                         |                        |                         |                        |
| c__Flavobacteriia       | 17.694                 | c__Flavobacteriia       | 14.344                 | c__Flavobacteriia       | 9.002                  |
| f__Cryomorphaceae       | 14.237                 | f__Flavobacteriaceae    | 12.012                 | f__Cryomorphaceae       | 6.296                  |
| f__Flavobacteriaceae    | 3.440                  | f__Cryomorphaceae       | 2.281                  | f__Flavobacteriaceae    | 2.653                  |

|                              |                 |                              |                 |                              |                 |
|------------------------------|-----------------|------------------------------|-----------------|------------------------------|-----------------|
|                              |                 |                              |                 |                              |                 |
| c__Bacteroidia               | 6.599           | c__Bacteroidia               | 2.660           | c__Bacteroidia               | 0.961           |
| f__Unclassified              | 5.642           | f__Unclassified              | 1.667           | f__Unclassified              | 0.428           |
| f__S24-7                     | 0.685           | f__Rikenellaceae             | 0.273           | f__S24-7                     | 0.311           |
| f__VC21_Bac22                | 0.107           | f__S24-7                     | 0.264           |                              |                 |
|                              |                 | f__Porphyromonadaceae        | 0.187           |                              |                 |
|                              |                 | f__SB-1                      | 0.126           |                              |                 |
|                              |                 |                              |                 |                              |                 |
| <b>p__Cyanobacteria</b>      | GWS % of Phylum | <b>p__Cyanobacteria</b>      | RBS % of Phylum | <b>p__Cyanobacteria</b>      | PZS % of Phylum |
| c__Chloroplast               | 16.614          | c__Chloroplast               | 89.501          | c__Chloroplast               | 80.722          |
| o__Stramenopiles             | 11.378          | o__Stramenopiles             | 88.365          | o__Stramenopiles             | 77.300          |
| o__Streptophyta              | 4.843           | o__Chlorophyta               | 0.864           | o__Chlorophyta               | 2.237           |
| o__Chlorophyta               | 0.394           | o__Streptophyta              | 0.172           | o__Streptophyta              | 0.664           |
|                              |                 |                              |                 | o__Cryptophyta               | 0.255           |
|                              |                 |                              |                 | o__UA01                      | 0.166           |
| f__Unclassified              | 16.614          | f__Unclassified              | 88.863          | f__Unclassified              | 79.116          |
|                              |                 | f__Chlamydomonadaceae        | 0.604           | f__Chlamydomonadaceae        | 1.384           |
|                              |                 |                              | 0.034           | f__Trebouxiophyceae          | 0.221           |
|                              |                 |                              |                 |                              |                 |
| c__ML635J-21                 | 82.087          | c__ML635J-21                 | 4.460           | c__ML635J-21                 | 8.703           |
| f__Unclassified              | 82.087          | f__Unclassified              | 4.460           | f__Unclassified              | 8.703           |
|                              |                 |                              |                 |                              |                 |
| c__4C0d-2                    | 0.394           | c__4C0d-2                    | 3.549           | c__4C0d-2                    | 6.677           |
| f__Unclassified              | 0.394           | f__Unclassified              | 3.549           | f__Unclassified              | 6.677           |
|                              |                 |                              |                 |                              |                 |
| c__Synechococcophycideae     | 0.394           | c__Synechococcophycideae     | 1.232           | c__Synechococcophycideae     | 3.410           |
| f__Synechococcaceae          | 0.394           | f__Synechococcaceae          | 0.753           | f__Synechococcaceae          | 3.200           |
|                              |                 | f__Unclassified              | 0.218           | f__Unclassified              | 0.111           |
|                              |                 | f__Pseudanabaenaceae         | 0.168           |                              |                 |
|                              |                 |                              |                 |                              |                 |
| <b>p__Nitrospiraea</b>       | GWS % of Phylum | <b>p__Nitrospiraea</b>       | RBS % of Phylum | <b>p__Nitrospiraea</b>       | PZS % of Phylum |
| c__Nitrospira                | 100.000         | c__Nitrospira                | 100.000         | c__Nitrospira                | 100.000         |
| f__Nitrospiraceae            | 95.983          | f__Nitrospiraceae            | 95.802          | f__Nitrospiraceae            | 94.855          |
| f__0319-6A21                 | 0.057           | f__0319-6A21                 | 3.349           | f__0319-6A21                 | 2.491           |
| f__Unclassified              | 2.942           | f__Unclassified              | 0.000           | f__Unclassified              | 2.226           |
| f__Thermodesulfovibrionaceae | 0.820           | f__Thermodesulfovibrionaceae | 0.554           | f__Thermodesulfovibrionaceae | 0.277           |
| f__Leptospirillaceae         | 0.198           | f__Leptospirillaceae         | 0.047           |                              |                 |
|                              |                 | f__FW                        | 0.248           |                              |                 |

| <b>p_Planctomycetes</b> | GWS % of Phylum | <b>p_Planctomycetes</b> | RBS % of Phylum | <b>p_Planctomycetes</b> | PZS % of Phylum |
|-------------------------|-----------------|-------------------------|-----------------|-------------------------|-----------------|
| c_Planctomycetia        | 77.789          | c_Planctomycetia        | 72.329          | c_Planctomycetia        | 74.614          |
| f_Planctomycetaceae     | 59.399          | f_Gemmataceae           | 28.807          | f_Gemmataceae           | 28.560          |
| f_Gemmataceae           | 15.045          | f_Pirellulaceae         | 27.892          | f_Pirellulaceae         | 27.072          |
| f_Pirellulaceae         | 2.623           | f_Planctomycetaceae     | 13.418          | f_Planctomycetaceae     | 16.021          |
| f_Unclassified          | 0.713           | f_Isosphaeraceae        | 1.402           | f_Isosphaeraceae        | 2.345           |
|                         |                 | f_Unclassified          | 0.810           | f_Unclassified          | 0.617           |
|                         |                 |                         |                 |                         |                 |
| c_Phycisphaerae         | 1.359           | c_Phycisphaerae         | 8.292           | c_Phycisphaerae         | 7.373           |
| f_Phycisphaeraceae      | 0.409           | f_Unclassified          | 8.178           | f_Unclassified          | 7.231           |
|                         |                 | f_Phycisphaeraceae      | 0.114           | f_Phycisphaeraceae      | 0.141           |
|                         |                 |                         |                 |                         |                 |
| c_OM190                 | 4.999           | c_OM190                 | 7.244           | c_OM190                 | 7.591           |
| f_Unclassified          | 4.999           | f_Unclassified          | 7.244           | f_Unclassified          | 7.591           |
|                         |                 |                         |                 |                         |                 |
| c_BD7-11                | 8.164           | c_BD7-11                | 1.937           | c_BD7-11                | 2.864           |
| f_Unclassified          | 8.164           | f_Unclassified          | 1.937           | f_Unclassified          | 2.864           |
|                         |                 |                         |                 |                         |                 |
| c_vadinHA49             | 7.204           | c_vadinHA49             | 3.052           | c_vadinHA49             | 3.722           |
| f_Unclassified          | 7.204           | f_Unclassified          | 3.052           | f_Unclassified          | 3.722           |
|                         |                 |                         |                 |                         |                 |
| <b>p_Verrumicrobia</b>  | GWS % of Phylum | <b>p_Verrumicrobia</b>  | RBS % of Phylum | <b>p_Verrumicrobia</b>  | PZS % of Phylum |
| c_Pedosphaerae          | 55.756          | c_Pedosphaerae          | 46.661          | c_Pedosphaerae          | 55.233          |
| f_Ellin517              | 17.455          | f_Unclassified          | 17.181          | f_Unclassified          | 21.533          |
| f_Unclassified          | 15.524          | f_auto67_4W             | 15.751          | f_auto67_4W             | 17.364          |
| f_R4-41B                | 10.968          | f_R4-41B                | 4.210           | f_R4-41B                | 6.342           |
| f_Ellin515              | 7.749           | f_Ellin517              | 3.374           | f_Ellin517              | 3.924           |
| f_auto67_4W             | 2.426           | f_Ellin515              | 2.304           | f_Ellin515              | 2.412           |
| f_Pedosphaeraceae       | 0.545           | f_Pedosphaeraceae       | 1.735           | f_Pedosphaeraceae       | 1.985           |
|                         |                 |                         |                 |                         |                 |
| c_Spartobacteria        | 7.081           | c_Spartobacteria        | 13.830          | c_Spartobacteria        | 12.223          |
| f_Chthoniobacteraceae   | 7.081           | f_Chthoniobacteraceae   | 13.830          | f_Chthoniobacteraceae   | 12.211          |
|                         |                 |                         |                 |                         |                 |
| c_Verrucomicrobiae      | 5.447           | c_Verrucomicrobiae      | 15.806          | c_Verrucomicrobiae      | 12.729          |
| f_Verrucomicrobiaceae   | 5.447           | f_Verrucomicrobiaceae   | 15.806          | f_Verrucomicrobiaceae   | 12.729          |
|                         |                 |                         |                 |                         |                 |
| c_Opitutae              | 30.775          | c_Opitutae              | 16.358          | c_Opitutae              | 17.976          |
| f_Opitutaceae           | 30.255          | f_Opitutaceae           | 15.487          | f_Opitutaceae           | 17.657          |

|                        |                    |                        |                    |                        |                    |
|------------------------|--------------------|------------------------|--------------------|------------------------|--------------------|
| f__Cerasiococcaceae    | 0.396              | f__Cerasiococcaceae    | 0.774              | f__Cerasiococcaceae    | 0.242              |
| f__Unclassified        | 0.124              |                        |                    |                        |                    |
|                        |                    |                        |                    |                        |                    |
|                        |                    | c__Verruco-5           | 3.634              | c__Verruco-5           | 1.689              |
|                        |                    | f__Unclassified        | 3.615              | f__Unclassified        | 1.684              |
|                        |                    |                        |                    |                        |                    |
| c__Methylacidiphilae   | 0.891              | c__Methylacidiphilae   | 2.014              | c__Methylacidiphilae   | 1.729              |
| f__Unclassified        | 0.891              | f__Unclassified        | 1.914              | f__Unclassified        | 1.627              |
|                        |                    |                        |                    |                        |                    |
| <b>p_Crenarchaeota</b> | GWS % of<br>Phylum | <b>p_Crenarchaeota</b> | RBS % of<br>Phylum | <b>p_Crenarchaeota</b> | PZS % of<br>Phylum |
| c__Thaumarchaeota      | 100.000            | c__Thaumarchaeota      | 100.000            | c__Thaumarchaeota      | 99.974             |
| f__Cenarchaeaceae      | 99.328             | f__Cenarchaeaceae      | 98.328             | f__Cenarchaeaceae      | 97.745             |
| f__Nitrososphaeraceae  | 0.493              | f__Nitrososphaeraceae  | 1.532              | f__Nitrososphaeraceae  | 1.206              |
| f__SAGMA-X             | 0.179              | f__SAGMA-X             | 0.140              | f__SAGMA-X             | 1.023              |
|                        |                    |                        |                    |                        |                    |
|                        |                    |                        |                    |                        |                    |
|                        |                    |                        |                    |                        |                    |
|                        |                    |                        |                    |                        |                    |
|                        |                    |                        |                    |                        |                    |

Table S6. Relative abundance of families within the major Proteobacterial classes and select non-Proteobacterial phyla in DCF. For a given sand type, the number of OTU hits for each family was summed across all water types and divided by the total number of hits for the corresponding phylum. Only families that comprised  $\geq 0.1\%$  of the phylum are shown. The notations p\_, c\_, o\_, and f\_ refer to phylum, class, order, and family, respectively.

| Taxa                    | GWS % of Phylum | Taxa                    | RBS % of Phylum | Taxa                    | PZS % of Phylum |
|-------------------------|-----------------|-------------------------|-----------------|-------------------------|-----------------|
| <b>p_Proteobacteria</b> |                 | <b>p_Proteobacteria</b> |                 | <b>p_Proteobacteria</b> |                 |
| c__Alphaproteobacteria  | 8.777           | c__Alphaproteobacteria  | 24.927          | c__Alphaproteobacteria  | 31.361          |
| f__Unclassified         | 1.868           | f__Unclassified         | 6.983           | f__Unclassified         | 12.153          |
| f__Hyphomicrobiaceae    | 1.526           | f__Rhodobacteraceae     | 6.023           | f__Sphingomonadaceae    | 4.906           |
| f__Sphingomonadaceae    | 1.099           | f__Sphingomonadaceae    | 5.376           | f__Rhodobacteraceae     | 4.543           |
| f__Phyllobacteriaceae   | 0.731           | f__Hyphomicrobiaceae    | 2.560           | f__Hyphomicrobiaceae    | 3.527           |
| f__Rhodospirillaceae    | 0.729           | f__Rhodospirillaceae    | 1.010           | f__Rhodospirillaceae    | 2.250           |
| f__Rhodobacteraceae     | 0.702           | f__Hyphomonadaceae      | 0.787           | f__Phyllobacteriaceae   | 0.915           |
| f__Bradyrhizobiaceae    | 0.575           | f__Caulobacteraceae     | 0.648           | f__Caulobacteraceae     | 0.880           |
| f__Caulobacteraceae     | 0.491           | f__Phyllobacteriaceae   | 0.428           | f__Bradyrhizobiaceae    | 0.817           |
| f__Beijerinckiaceae     | 0.377           | f__Bradyrhizobiaceae    | 0.331           | f__Rhizobiaceae         | 0.336           |
| f__Methylobacteriaceae  | 0.167           | f__Acetobacteraceae     | 0.211           | f__Hyphomonadaceae      | 0.333           |
| f__Hyphomonadaceae      | 0.141           | f__Rickettsiaceae       | 0.111           | f__Erythrobacteraceae   | 0.193           |
| f__Rhizobiaceae         | 0.134           |                         |                 | f__Acetobacteraceae     | 0.192           |
|                         |                 |                         |                 |                         |                 |
| c__Betaproteobacteria   | 56.867          | c__Betaproteobacteria   | 26.499          | c__Betaproteobacteria   | 36.519          |
| f__Comamonadaceae       | 27.178          | f__Comamonadaceae       | 10.821          | f__Comamonadaceae       | 12.791          |
| f__Methylophilaceae     | 19.440          | f__Unclassified         | 8.704           | f__Methylophilaceae     | 11.614          |
| f__Rhodocyclaceae       | 5.270           | f__Rhodocyclaceae       | 2.288           | f__Unclassified         | 6.287           |
| f__Oxalobacteraceae     | 3.590           | f__Methylophilaceae     | 1.716           | f__Rhodocyclaceae       | 2.594           |
| f__Unclassified         | 0.728           | f__Oxalobacteraceae     | 1.392           | f__Oxalobacteraceae     | 2.156           |
| f__Hydrogenophilaceae   | 0.456           | f__Alcaligenaceae       | 0.778           | f__Alcaligenaceae       | 0.270           |
| f__Neisseriaceae        | 0.109           | f__Neisseriaceae        | 0.166           | f__Nitrosomonadaceae    | 0.188           |
|                         |                 |                         |                 | f__Neisseriaceae        | 0.186           |
|                         |                 |                         |                 | f__Hydrogenophilaceae   | 0.142           |
|                         |                 |                         |                 |                         |                 |
| c__Deltaproteobacteria  | 3.014           | c__Deltaproteobacteria  | 14.104          | c__Deltaproteobacteria  | 7.807           |
| f__OM27                 | 1.586           | f__Unclassified         | 6.188           | f__Unclassified         | 3.133           |
| f__Bdellovibrionaceae   | 0.787           | f__Geobacteraceae       | 1.556           | f__Syntrophobacteraceae | 1.249           |
| f__Unclassified         | 0.558           | f__Syntrophobacteraceae | 1.472           | f__Haliangiaceae        | 0.626           |
|                         |                 | f__OM27                 | 0.750           | f__Nannocystaceae       | 0.495           |

|                        |                 |                        |                 |                           |                 |
|------------------------|-----------------|------------------------|-----------------|---------------------------|-----------------|
|                        |                 | f__Polyangiaceae       | 0.633           | f__OM27                   | 0.470           |
|                        |                 | f__Myxococcaceae       | 0.561           | f__Bdellovibrionaceae     | 0.408           |
|                        |                 | f__Haliangiaceae       | 0.552           | f__JTB38                  | 0.274           |
|                        |                 | f__JTB38               | 0.416           | f__Bacteriovoracaceae     | 0.184           |
|                        |                 | f__Nannocystaceae      | 0.311           | f__Myxococcaceae          | 0.176           |
|                        |                 | f__Bdellovibrionaceae  | 0.305           | f__Geobacteraceae         | 0.140           |
|                        |                 | f__Desulfobulbaceae    | 0.250           | f__Polyangiaceae          | 0.136           |
|                        |                 | f__Desulfuromonadaceae | 0.211           | f__MND4                   | 0.122           |
|                        |                 | f__Bacteriovoracaceae  | 0.186           |                           |                 |
|                        |                 | f__Desulfobacteraceae  | 0.178           |                           |                 |
|                        |                 | f__MND4                | 0.147           |                           |                 |
|                        |                 | f__Syntrophaceae       | 0.144           |                           |                 |
|                        |                 |                        |                 |                           |                 |
| c__Gammaproteobacteria | 31.310          | c__Gammaproteobacteria | 33.941          | c__Gammaproteobacteria    | 24.021          |
| f__Pseudomonadaceae    | 26.094          | f__Xanthomonadaceae    | 13.810          | f__Pseudomonadaceae       | 3.857           |
| f__Legionellaceae      | 1.561           | f__Sinobacteraceae     | 5.302           | f__Unclassified           | 2.985           |
| f__Coxiellaceae        | 0.824           | f__Unclassified        | 4.253           | f__Sinobacteraceae        | 2.898           |
| f__Sinobacteraceae     | 0.683           | f__Coxiellaceae        | 3.184           | f__Xanthomonadaceae       | 2.724           |
| f__Unclassified        | 0.659           | f__Piscirickettsiaceae | 2.000           | f__Moraxellaceae          | 2.318           |
| f__Moraxellaceae       | 0.554           | f__OM60                | 1.135           | f__Coxiellaceae           | 1.905           |
| f__Alteromonadaceae    | 0.355           | f__Marinicellaceae     | 1.055           | f__Alteromonadaceae       | 1.264           |
| f__Oleiphilaceae       | 0.228           | f__Pseudomonadaceae    | 0.937           | f__Piscirickettsiaceae    | 1.074           |
| f__Chromatiaceae       | 0.162           | f__HTCC2089            | 0.479           | f__Legionellaceae         | 0.833           |
|                        |                 | f__Legionellaceae      | 0.412           | f__Marinicellaceae        | 0.766           |
|                        |                 | f__Crenotrichaceae     | 0.315           | f__HTCC2188               | 0.568           |
|                        |                 | f__125ds10             | 0.310           | f__Colwelliaceae          | 0.504           |
|                        |                 | f__Moraxellaceae       | 0.205           | f__Crenotrichaceae        | 0.424           |
|                        |                 | f__Chromatiaceae       | 0.134           | f__125ds10                | 0.415           |
|                        |                 | f__Alteromonadaceae    | 0.116           | f__Ectothiorhodospiraceae | 0.399           |
|                        |                 |                        |                 | f__OM60                   | 0.296           |
|                        |                 |                        |                 | f__HTCC2089               | 0.199           |
|                        |                 |                        |                 | f__Methylococcaceae       | 0.177           |
|                        |                 |                        |                 |                           |                 |
| <b>p_Acidobacteria</b> | GWS % of Phylum | <b>p_Acidobacteria</b> | RBS % of Phylum | <b>p_Acidobacteria</b>    | PZS % of Phylum |
| c__Chloracidobacteria  | 19.055          | c__Chloracidobacteria  | 38.590          | c__Chloracidobacteria     | 26.250          |
| f__Ellin6075           | 15.773          | f__Ellin6075           | 33.469          | f__Ellin6075              | 22.928          |
| f__Unclassified        | 3.283           | f__Unclassified        | 5.115           | f__Unclassified           | 3.315           |

|                         |                 |                         |                 |                         |                 |
|-------------------------|-----------------|-------------------------|-----------------|-------------------------|-----------------|
| c__Acidobacteria-6      | 75.661          | c__Acidobacteria-6      | 39.903          | c__Acidobacteria-6      | 51.451          |
| f__mb2424               | 62.503          | f__Unclassified         | 23.386          | f__Unclassified         | 31.995          |
| f__Unclassified         | 12.597          | f__mb2424               | 9.061           | f__mb2424               | 11.779          |
| f__RB40                 | 0.560           | f__RB40                 | 7.456           | f__RB40                 | 7.677           |
|                         |                 |                         |                 |                         |                 |
| c__Holophagae           | 0.587           | c__Holophagae           | 5.004           | c__Holophagae           | 1.811           |
| f__Holophagaceae        | 0.587           | f__Holophagaceae        | 4.907           | f__Holophagaceae        | 1.803           |
|                         |                 |                         |                 |                         |                 |
| c__Sva0725              | 0.107           | c__Sva0725              | 2.445           | c__Sva0725              | 3.538           |
| f__Unclassified         | 0.107           | f__Unclassified         | 2.445           | f__Unclassified         | 3.538           |
|                         |                 |                         |                 |                         |                 |
| c__RB25                 | 0.347           | c__RB25                 | 2.703           | c__RB25                 | 5.548           |
| f__Unclassified         | 0.347           | f__Unclassified         | 2.703           | f__Unclassified         | 5.548           |
|                         |                 |                         |                 |                         |                 |
| c__iii1-8               | 0.107           | c__iii1-8               | 4.328           | c__iii1-8               | 2.008           |
| f__Unclassified         | 0.107           | f__Unclassified         | 4.328           | f__Unclassified         | 2.008           |
|                         |                 |                         |                 |                         |                 |
| c__AT-s54               | 0.187           | c__AT-s54               | 3.013           | c__AT-s54               | 2.135           |
| f__Unclassified         | 0.187           | f__Unclassified         | 3.013           | f__Unclassified         | 2.135           |
|                         |                 |                         |                 |                         |                 |
| <b>p__Bacteroidetes</b> | GWS % of Phylum | <b>p__Bacteroidetes</b> | RBS % of Phylum | <b>p__Bacteroidetes</b> | PZS % of Phylum |
| c__Saprospirae          | 3.259           | c__Saprospirae          | 38.642          | c__Saprospirae          | 25.135          |
| f__Chitinophagaceae     | 2.392           | f__Chitinophagaceae     | 25.800          | f__Chitinophagaceae     | 19.740          |
| f__Saprospiraceae       | 0.867           | f__Saprospiraceae       | 11.929          | f__Saprospiraceae       | 4.833           |
|                         |                 | f__Unclassified         | 0.912           | f__Unclassified         | 0.562           |
|                         |                 |                         |                 |                         |                 |
| c__Bacteroidia          | 0.186           | c__Bacteroidia          | 2.034           | c__Bacteroidia          | 0.560           |
| f__S24-7                | 0.110           | f__Unclassified         | 1.641           | f__Unclassified         | 0.483           |
|                         |                 | f__SB-1                 | 0.165           |                         |                 |
|                         |                 |                         |                 |                         |                 |
| c__BME43                |                 | c__BME43                | 0.336           | c__BME43                |                 |
|                         |                 | f__Unclassified         | 0.336           |                         |                 |
|                         |                 |                         |                 |                         |                 |
| c__Cytophagia           | 0.905           | c__Cytophagia           | 15.801          | c__Cytophagia           | 14.494          |
| f__Cytophagaceae        | 0.905           | f__Cytophagaceae        | 15.354          | f__Cytophagaceae        | 14.337          |
|                         |                 | f__Flammeovirgaceae     | 0.252           |                         |                 |
|                         |                 | f__Amoebophilaceae      | 0.103           |                         |                 |
|                         |                 |                         |                 |                         |                 |

|                        |                 |                              |                 |                              |                 |
|------------------------|-----------------|------------------------------|-----------------|------------------------------|-----------------|
| c__Flavobacteriia      | 91.760          | c__Flavobacteriia            | 30.164          | c__Flavobacteriia            | 49.247          |
| f__Flavobacteriaceae   | 88.526          | f__Flavobacteriaceae         | 28.085          | f__Flavobacteriaceae         | 45.549          |
| f__Cryomorphaceae      | 3.235           | f__Cryomorphaceae            | 2.060           | f__Cryomorphaceae            | 3.693           |
|                        |                 |                              |                 |                              |                 |
| c__Sphingobacteriia    | 2.821           | c__Sphingobacteriia          | 12.702          | c__Sphingobacteriia          | 10.044          |
| f__Unclassified        | 2.684           | f__Unclassified              | 12.597          | f__Unclassified              | 9.914           |
| f__Sphingobacteriaceae | 0.137           | f__Sphingobacteriaceae       | 0.105           | f__Sphingobacteriaceae       | 0.130           |
|                        |                 |                              |                 |                              |                 |
|                        |                 | c__VC2_1_Bac22               | 0.129           |                              |                 |
|                        |                 | f__Unclassified              | 0.129           |                              |                 |
|                        |                 |                              |                 |                              |                 |
| <b>p_Cyanobacteria</b> | GWS % of Phylum | <b>p_Cyanobacteria</b>       | RBS % of Phylum | <b>p_Cyanobacteria</b>       | PZS % of Phylum |
| c__Chloroplast         | 6.150           | c__Chloroplast               | 94.874          | c__Chloroplast               | 83.913          |
| o__Stramenopiles       | 4.513           | o__Stramenopiles             | 93.952          | o__Stramenopiles             | 81.304          |
| o__Streptophyta        | 1.548           | o__Chlorophyta               | 0.509           | o__Chlorophyta               | 1.901           |
|                        |                 | o__Streptophyta              | 0.342           | o__Streptophyta              | 0.397           |
| f__Unclassified        | 6.061           | f__Unclassified              | 94.442          | f__Unclassified              | 82.264          |
| f__Chlamydomonadaceae  | 0.088           | f__Chlamydomonadaceae        | 0.301           | f__Chlamydomonadaceae        | 0.896           |
|                        |                 | f__Trebouxiophyceae          | 0.129           | f__Trebouxiophyceae          | 0.751           |
|                        |                 |                              |                 |                              |                 |
| c__ML635J-21           | 93.584          | c__ML635J-21                 | 2.640           | c__ML635J-21                 | 3.713           |
| f__Unclassified        | 93.584          | f__Unclassified              | 2.640           | f__Unclassified              | 3.713           |
|                        |                 |                              |                 |                              |                 |
| c__4C0d-2              | 0.176           | c__4C0d-2                    | 0.509           | c__4C0d-2                    | 8.071           |
| f__Unclassified        | 0.176           | f__Unclassified              | 0.509           | f__Unclassified              | 8.071           |
|                        |                 |                              |                 |                              |                 |
|                        |                 | c__Synechococcophycideae     | 1.133           | c__Synechococcophycideae     | 3.833           |
|                        |                 | f__Synechococcaceae          | 0.765           | f__Synechococcaceae          | 3.593           |
|                        |                 | f__Chamaesiphonaceae         | 0.200           | f__Pseudanabaenaceae         | 0.157           |
|                        |                 | f__Pseudanabaenaceae         | 0.115           |                              |                 |
|                        |                 |                              |                 |                              |                 |
| <b>p_Nitrospiraea</b>  | GWS % of Phylum | <b>p_Nitrospiraea</b>        | RBS % of Phylum | <b>p_Nitrospiraea</b>        | PZS % of Phylum |
| c__Nitrospira          | 100.000         | c__Nitrospira                | 100.000         | c__Nitrospira                | 100.000         |
| f__Nitrospiraceae      | 98.972          | f__Nitrospiraceae            | 92.435          | f__Nitrospiraceae            | 94.491          |
| f__Unclassified        | 0.673           | f__Thermodesulfovibrionaceae | 3.603           | f__0319-6A21                 | 4.503           |
| f__0319-6A21           | 0.337           | f__0319-6A21                 | 3.430           | f__Thermodesulfovibrionaceae | 0.711           |
|                        |                 | f__FW                        | 0.519           | f__Leptospirillaceae         | 0.134           |
|                        |                 |                              |                 |                              |                 |



|                         |                 |                         |                 |                         |                 |
|-------------------------|-----------------|-------------------------|-----------------|-------------------------|-----------------|
| <b>p_Planctomycetes</b> | GWS % of Phylum | <b>p_Planctomycetes</b> | RBS % of Phylum | <b>p_Planctomycetes</b> | PZS % of Phylum |
| c__Planctomycetia       | 87.615          | c__Planctomycetia       | 86.321          | c__Planctomycetia       | 81.278          |
| f__Planctomycetaceae    | 62.160          | f__Gemmataceae          | 32.375          | f__Gemmataceae          | 32.886          |
| f__Gemmataceae          | 23.707          | f__Pirellulaceae        | 30.186          | f__Pirellulaceae        | 24.020          |
| f__Pirellulaceae        | 1.277           | f__Planctomycetaceae    | 19.411          | f__Planctomycetaceae    | 19.787          |
| f__Unclassified         | 0.296           | f__Isosphaeraceae       | 3.806           | f__Isosphaeraceae       | 4.191           |
| f__Isosphaeraceae       | 0.174           | f__Unclassified         | 0.543           | f__Unclassified         | 0.394           |
|                         |                 |                         |                 |                         |                 |
| c__Phycisphaerae        | 1.696           | c__Phycisphaerae        | 4.520           | c__Phycisphaerae        | 4.015           |
| f__Phycisphaeraceae     | 1.594           | f__Unclassified         | 4.480           | f__Unclassified         | 3.977           |
| f__Unclassified         | 0.102           |                         |                 |                         |                 |
|                         |                 |                         |                 |                         |                 |
| c__OM190                | 9.575           | c__OM190                | 4.275           | c__OM190                | 8.080           |
| f__Unclassified         | 9.575           | f__Unclassified         | 4.275           | f__Unclassified         | 8.080           |
|                         |                 |                         |                 |                         |                 |
| c__BD7-11               | 0.674           | c__BD7-11               | 0.443           | c__BD7-11               | 1.943           |
| f__Unclassified         | 0.674           | f__Unclassified         | 0.443           | f__Unclassified         | 1.943           |
|                         |                 |                         |                 |                         |                 |
| c__vadinHA49            | 0.102           | c__vadinHA49            | 2.220           | c__vadinHA49            | 2.655           |
| f__Unclassified         | 0.102           | f__Unclassified         | 2.220           | f__Unclassified         | 2.655           |
|                         |                 |                         |                 |                         |                 |
| <b>p_Verrumicrobia</b>  | GWS % of Phylum | <b>p_Verrumicrobia</b>  | RBS % of Phylum | <b>p_Verrumicrobia</b>  | PZS % of Phylum |
| c__Pedosphaerae         | 84.460          | c__Pedosphaerae         | 28.738          | c__Pedosphaerae         | 56.901          |
| f__Ellin517             | 60.278          | f__auto67_4W            | 13.156          | f__Unclassified         | 18.968          |
| f__R4-41B               | 14.969          | f__Unclassified         | 6.912           | f__auto67_4W            | 18.620          |
| f__Unclassified         | 5.710           | f__R4-41B               | 5.389           | f__R4-41B               | 6.868           |
| f__Pedosphaeraceae      | 0.802           | f__Ellin515             | 1.805           | f__Ellin517             | 6.269           |
| f__auto67_4W            | 0.432           | f__Ellin517             | 0.501           | f__Ellin515             | 1.725           |
|                         |                 | f__Pedosphaeraceae      | 0.216           | f__Pedosphaeraceae      | 0.483           |
|                         |                 |                         |                 |                         |                 |
| c__Spartobacteria       | 2.114           | c__Spartobacteria       | 12.169          | c__Spartobacteria       | 8.017           |
| f__Chthoniobacteraceae  | 2.114           | f__Chthoniobacteraceae  | 12.162          | f__Chthoniobacteraceae  | 8.017           |
|                         |                 |                         |                 |                         |                 |
| c__Verrucomicrobiae     | 2.407           | c__Verrucomicrobiae     | 50.963          | c__Verrucomicrobiae     | 21.837          |
| f__Verrucomicrobiaceae  | 2.407           | f__Verrucomicrobiaceae  | 50.963          | f__Verrucomicrobiaceae  | 21.837          |
|                         |                 |                         |                 |                         |                 |
| c__Opitutae             | 10.988          | c__Opitutae             | 5.495           | c__Opitutae             | 8.750           |
| f__Cerasiococcaceae     | 6.049           | f__Opitutaceae          | 5.398           | f__Opitutaceae          | 7.671           |
| f__Opitutaceae          | 4.877           |                         |                 | f__Cerasiococcaceae     | 1.032           |

|                        |                 |                        |                 |                        |                 |
|------------------------|-----------------|------------------------|-----------------|------------------------|-----------------|
|                        |                 |                        |                 |                        |                 |
|                        |                 | c__Verruco-5           | 1.427           | c__Verruco-5           | 1.535           |
|                        |                 | f__Unclassified        | 1.423           | f__Unclassified        | 1.522           |
|                        |                 |                        |                 |                        |                 |
|                        |                 | c__Methylacidiphilae   | 0.529           | c__Methylacidiphilae   | 1.505           |
|                        |                 | f__Unclassified        | 0.525           | f__Unclassified        | 1.462           |
|                        |                 |                        |                 |                        |                 |
| <b>p_Crenarchaeota</b> | GWS % of Phylum | <b>p_Crenarchaeota</b> | RBS % of Phylum | <b>p_Crenarchaeota</b> | PZS % of Phylum |
| c__Thaumarchaeota      | 100.000         | c__Thaumarchaeota      | 99.693          | c__Thaumarchaeota      | 99.974          |
| f__Cenarchaeaceae      | 82.768          | f__Cenarchaeaceae      | 54.506          | f__Cenarchaeaceae      | 91.898          |
| f__Nitrososphaeraceae  | 14.883          | f__Nitrososphaeraceae  | 45.126          | f__Nitrososphaeraceae  | 4.102           |
| f__SAGMA-X             | 2.350           |                        |                 | f__SAGMA-X             | 3.859           |
|                        |                 |                        |                 | f__Unclassified        | 0.115           |
|                        |                 |                        |                 |                        |                 |
|                        |                 |                        |                 |                        |                 |
